# Supplementary material for: Stable isotopes of Hawaiian spiders reflect substrate properties along a chronosequence
Source: PeerJ. 2018 Mar 21;6:e4527. doi: 10.7717/peerj.4527 (PMC5866714; doi:10.7717/peerj.4527)
Supplement: Supplemental Information 5 [file peerj-06-4527-s016.xlsx]

## Sheet: bigislandiso
UID	year	plot	site	taxon	category	age	sex	weight	carapace.width	percentN	ugN	delta15N	percentC	mgC	delta13C	CtoN	body.length	controlled
0311LA.BROWN1	2015	dspin	Laupahoehoe	quasimodo	spiny	juvenile	female	6.392		9.96	165	4.01	48.69	0.81	-26.83	4.89		yes
0311LA01	2015	dweb	Laupahoehoe	hawaiensis	web	juvenile	male	1.993	1.294	11.53	216	3.68	48.13	0.9	-26.16	4.17	5.241	yes
0311LA05	2015	dweb	Laupahoehoe	hawaiensis	web	adult	female	3.251	1.453	11.6	177	3.5	45.68	0.7	-26.68	3.94	5.839	yes
0311LA06	2015	dweb	Laupahoehoe	hawaiensis	web	juvenile	unknown	1.705	1.088	10.84	164	3.84	48.16	0.73	-26.84	4.44	4.334	yes
0312LA03	2015	dspin	Laupahoehoe	quasimodo	spiny	juvenile	unknown	0.551	0.935	11.23	62	2.1	47.92	0.26	-25.46	4.27	2.457	yes
0312LA07	2015	dspin	Laupahoehoe	quasimodo	spiny	juvenile	male	2.147	1.402	10.95	235	2.68	44.98	0.97	-25.9	4.11	4.69	yes
0312LA14	2015	dspin	Laupahoehoe	anuenue	spiny	juvenile	unknown	1.545	0.985	10.24	158	2.94	49.02	0.76	-27.97	4.79	3.419	yes
0312LA17	2015	dspin	Laupahoehoe	anuenue	spiny	adult	female	1.937	1.199	11.06	214	3.05	46.49	0.9	-27.85	4.2	4.201	yes
0313LA01	2015	dweb	Laupahoehoe	goldendome	web	adult	female	0.946	0.91	9.23	87	4.1	47.61	0.45	-27.74	5.16	2.977	yes
0313LA02	2015	dweb	Laupahoehoe	goldendome	web	adult	female	0.873	0.936	10.07	88	3.88	47.5	0.41	-27.35	4.72	3.272	yes
0313LA03	2015	dweb	Laupahoehoe	goldendome	web	adult	female	0.531	0.884	10.99	58	5.34	46.87	0.25	-26.46	4.26	2.894	yes
0313LA05	2015	dweb	Laupahoehoe	goldendome	web	juvenile	male	0.453	0.799	9.67	44	4.34	50.81	0.23	-27	5.26	2.594	yes
0313LA07	2015	dweb	Laupahoehoe	hawaiensis	web	juvenile	unknown	0.826	0.883	8.98	74	3.25	49.57	0.41	-27.57	5.52	2.969	yes
0313LA11	2015	dweb	Laupahoehoe	hawaiensis	web	juvenile	unknown	0.511	0.721	9.63	49	2.91	52.17	0.27	-27.59	5.42	2.316	yes
0314LA01	2015	dspin	Laupahoehoe	quasimodo	spiny	juvenile	unknown	2.41	1.432	9.66	233	1.85	48.09	1.16	-26.63	4.98	4.907	yes
0314LA02	2015	dspin	Laupahoehoe	quasimodo	spiny	juvenile	unknown	2.104	1.959	9.23	194	2.76	48.71	1.02	-26.48	5.28	7.624	yes
0314LA03	2015	dspin	Laupahoehoe	quasimodo	spiny	juvenile	unknown	1.682		10.04	169	2.64	50.45	0.85	-26.92	5.03		yes
0314LA04	2015	dspin	Laupahoehoe	quasimodo	spiny	adult	male	3.981	1.652	11.51	178	3.09	50.88	0.79	-27.06	4.42	5.652	yes
0314LA05	2015	dspin	Laupahoehoe	quasimodo	spiny	juvenile	male	4.494	1.374	10.32	165	1.99	46.77	0.75	-25.49	4.53	5.544	yes
0314LA06	2015	dspin	Laupahoehoe	brevignatha	spiny	juvenile	unknown	1.536	1.075	10.98	169	0.62	45.84	0.7	-27.06	4.17	4.53	yes
0314LA07	2015	dspin	Laupahoehoe	brevignatha	spiny	juvenile	unknown	1.791	1.22	10.97	196	1.21	50.92	0.91	-27.14	4.64	4.626	yes
0314LA08	2015	dspin	Laupahoehoe	quasimodo	spiny	juvenile	unknown	2.741	1.207	11	150	2.81	48.17	0.66	-26.63	4.38	4.634	yes
0314LA09	2015	dspin	Laupahoehoe	anuenue	spiny	adult	male	1.394	1.056	11.16	156	2.15	46.28	0.65	-27.42	4.15	3.881	yes
0314LA11	2015	dspin	Laupahoehoe	brevignatha	spiny	adult	female	3.494	1.568	11.76	176	3.38	49.28	0.74	-27.08	4.19	5.684	yes
0314LA15	2015	dweb	Laupahoehoe	goldendome	web	juvenile	male	0.6	0.821	9.96	60	2.46	49.77	0.3	-26.32	5	2.349	yes
0314LA19	2015	dspin	Laupahoehoe	brevignatha	spiny	juvenile	unknown	1.528	1.223	10.37	158	2.03	49.03	0.75	-26.95	4.73	5.691	yes
0314LA20	2015	dspin	Laupahoehoe	quasimodo	spiny	juvenile	unknown	4.788	1.399	10.93	159	3.57	47.23	0.69	-26.41	4.32	5.759	yes
0315LA05	2015	dspin	Laupahoehoe	quasimodo	spiny	juvenile	unknown	1.059	1.082	11.28	119	1.7	46.89	0.5	-26.76	4.16	3.461	yes
0315LA09	2015	dspin	Laupahoehoe	anuenue	spiny	juvenile	male	1.529	0.963	10.26	157	2.77	48.74	0.75	-26.71	4.75	3.715	yes
0315LA10	2015	dspin	Laupahoehoe	quasimodo	spiny	juvenile	male	1.166	1.132	11.36	132	2.97	45.03	0.53	-26.32	3.96	3.575	yes
0315LA12	2015	dweb	Laupahoehoe	goldendome	web	adult	female	0.774	0.968	10.92	84	3.24	47.75	0.37	-27.62	4.37	3.076	yes
0315LA15	2015	dspin	Laupahoehoe	anuenue	spiny	adult	male	1.745	1.108	11.03	192	2.68	50.34	0.88	-27.84	4.57	4.034	yes
0315LA17	2015	dweb	Laupahoehoe	goldendome	web	juvenile	male	0.499	0.772	10.83	54	3.15	48.63	0.24	-26.47	4.49	2.463	yes
0315LA19	2015	dweb	Laupahoehoe	goldendome	web	adult	female	0.861	0.865	11.45	99	4.65	47.11	0.41	-27.13	4.11	2.859	yes
0315LA21	2015	dweb	Laupahoehoe	goldendome	web	adult	female	0.719	0.823	8.84	64	3.23	50.93	0.37	-27.86	5.76	2.695	yes
0318PU01	2015	aweb	PuuMak	goldendome	web	adult	female	1.718	0.874	9.9	170	-2.8	54	0.93	-26.71	5.46	3.4	yes
0318PU03	2015	aweb	PuuMak	longclaw	web	juvenile	unknown	0.775	0.868	10.24	56	-0.59	48.01	0.26	-27.1	4.69	3.954	yes
0318PU04	2015	aweb	PuuMak	longclaw	web	adult	male	1.814	1.16	11.81	202	-0.89	49.87	0.85	-26.21	4.22	5.494	yes
0318PU06	2015	aweb	PuuMak	perkinsi	web	adult	female	11.848	2.054	12.03	175	-2.12	47.41	0.69	-26.11	3.94	8.774	yes
0318PU12	2015	aweb	PuuMak	goldendome	web	juvenile	unknown	0.614	0.698	10.7	66	-3.19	46.71	0.29	-26.38	4.37	2.252	yes
0318PU14	2015	aweb	PuuMak	perkinsi	web	juvenile	male	1.761	1.415	10.34	182	-3.77	50.8	0.89	-26.44	4.91	6.354	yes
0318PU16	2015	aweb	PuuMak	perkinsi	web	juvenile	male	8.699	1.572	8.99	145	-3.79	52.87	0.86	-27.45	5.88	6.985	yes
0318PU17	2015	aspin	PuuMak	brevignatha	spiny	juvenile	male	2.606	1.162	10.36	270	-4.63	45.29	1.18	-26.94	4.37	5.684	yes
0319PU02	2015	aweb	PuuMak	goldendome	web	juvenile	male	0.675	0.841	9.66	65	-1.45	48.46	0.33	-27.17	5.02	2.658	yes
0319PU03	2015	aweb	PuuMak	goldendome	web	adult	female	1.221	0.891	9.53	116	-1.75	48.27	0.59	-26.53	5.06	3.256	yes
0319PU04	2015	aweb	PuuMak	goldendome	web	adult	female	0.483	0.901	11.35	55	-2.72	44.72	0.22	-26.62	3.94	2.683	yes
0319PU06	2015	aspin	PuuMak	brevignatha	spiny	adult	male	1.975	1.341	11.6	229	-4.62	48.69	0.96	-26.67	4.2	4.833	yes
0319PU09	2015	aweb	PuuMak	goldendome	web	adult	female	0.57	0.834	10.38	59	-3.21	48.5	0.28	-27.14	4.67	2.64	yes
0319PU12	2015	aspin	PuuMak	brevignatha	spiny	adult	female	3.229	1.385	12.05	186	-4.22	47.54	0.73	-26.8	3.94	5.5	yes
0319PU13	2015	aweb	PuuMak	goldendome	web	adult	female	1.152	0.941	8.69	100	-2.21	44.9	0.52	-26.97	5.17	3.372	yes
0319PU14	2015	aweb	PuuMak	goldendome	web	adult	female	0.773	0.84	10.72	83	-2.62	45.46	0.35	-26.38	4.24	2.914	yes
0319PU18	2015	aweb	PuuMak	goldendome	web	adult	female	0.981	0.837	10.04	99	-1.55	46.34	0.45	-26.72	4.61	3.028	yes
0319PU19	2015	aspin	PuuMak	brevignatha	spiny	juvenile	male	2.373	1.065	11.3	140	-2.77	46.59	0.58	-27.27	4.12	4.97	yes
0319PU20	2015	aweb	PuuMak	perkinsi	web	juvenile	unknown	3.749	1.344	9.84	173	-2.16	44.84	0.79	-26.61	4.56	5.58	yes
0321PU02	2015	aspin	PuuMak	brevignatha	spiny	juvenile	unknown	0.432	0.837	12.9	56	-4.74	45.78	0.2	-27.01	3.55	2.719	yes
0321PU03	2015	aweb	PuuMak	goldendome	web	adult	female	0.729	0.906	11.29	82	-2.89	45.69	0.33	-25.93	4.05	2.956	yes
0321PU07	2015	aweb	PuuMak	hawaiensis	web	adult	female	2.213	1.327	11.67	183	-1.31	47.59	0.75	-25.61	4.08	6.436	yes
0321PU08	2015	aspin	PuuMak	brevignatha	spiny	juvenile	male	1.095	1.063	11.39	125	-4.9	45.14	0.49	-26.62	3.96	4.098	yes
0321PU11	2015	aweb	PuuMak	goldendome	web	adult	female	0.755	0.867	10.38	78	-2.99	46.16	0.35	-27.04	4.45	2.918	yes
0321PU13	2015	aweb	PuuMak	hawaiensis	web	juvenile	male	4.508	1.183	11.07	162	-1.99	50.37	0.74	-26.2	4.55	5.592	yes
0321PU16	2015	aweb	PuuMak	hawaiensis	web	juvenile	unknown	4.166	1.148	10.64	68	-4.25	48.56	0.34	-27.41	4.56	4.962	yes
0321PU17	2015	aweb	PuuMak	perkinsi	web	juvenile	female	9.643	1.868	10.11	157	-3.74	48.66	0.76	-26.67	4.81	8.027	yes
0321PU18	2015	aspin	PuuMak	brevignatha	spiny	adult	female	3.65	1.423	11.67	172	-4.14	48.54	0.71	-26.88	4.16	5.922	yes
0323LA.ANU01	2015	dspin	Laupahoehoe	anuenue	spiny	adult	female	2.799	1.043	10.06	154	2.44	48.31	0.74	-27.65	4.8	4.182	yes
0323LA.ARI01	2015	dzAr	Laupahoehoe	Ariamnes	zAri	adult	male	1.061	0.87	10.04	106	5.93	47.91	0.51	-26.67	4.77	6.8	yes
0323LA.ARI02	2015	dzAr	Laupahoehoe	Ariamnes	zAri	juvenile	unknown	0.416	0.585	10.22	43	3.58	46.44	0.19	-26.72	4.54	2.987	yes
0323LA.ARI03	2015	dzAr	Laupahoehoe	Ariamnes	zAri	adult	female	3.633	0.997	10.99	162	4.6	49.96	0.74	-26.24	4.55	7.168	yes
0323LA.ARI06	2015	dzAr	Laupahoehoe	Ariamnes	zAri	juvenile	unknown	0.527	0.646	9.46	50	5.44	47.35	0.25	-26.92	5.01	3.764	yes
0323LA.ARI07	2015	dzAr	Laupahoehoe	Ariamnes	zAri	adult	female	2.651	1.04	10.38	159	3.85	52.72	0.81	-26.77	5.08	6.979	yes
0323LA.BRE01	2015	dspin	Laupahoehoe	brevignatha	spiny	juvenile	unknown	0.206	0.698	11.76	24	2.11	44.99	0.09	-26.61	3.83	1.977	yes
0323LA.BRE02	2015	dspin	Laupahoehoe	brevignatha	spiny	adult	male	2.929	1.423	12.23	175	2.98	46.9	0.67	-26.32	3.83	5.689	yes
0323LA.BRE03	2015	dspin	Laupahoehoe	brevignatha	spiny	adult	male	3.098	1.398	11.76	150	2.09	45.25	0.58	-26.67	3.85	5.681	yes
0323LA.BRE04	2015	dspin	Laupahoehoe	brevignatha	spiny	juvenile	unknown	0.801	0.874	9.97	80	1.05	48.36	0.39	-27.76	4.85	3.285	yes
0323LA.BRE05	2015	dspin	Laupahoehoe	brevignatha	spiny	adult	male	2.415	1.392	12.01	286	2.08	45.96	1.09	-27.08	3.83	5.817	yes
0323LA.QUA02	2015	dspin	Laupahoehoe	quasimodo	spiny	juvenile	male	2.377	1.4	10.43	248	3.01	44.04	1.05	-27.27	4.22	4.672	yes
0323LA.QUA03	2015	dspin	Laupahoehoe	quasimodo	spiny	juvenile	unknown	1.678	1.258	9.35	157	2.93	47.4	0.8	-26.52	5.07	4.833	yes
0324LA.ANU01	2015	dspin	Laupahoehoe	anuenue	spiny	juvenile	unknown	0.734	0.888	10.43	77	2.78	45.53	0.33	-27.23	4.37	2.866	yes
0324LA.ARI01	2015	dzAr	Laupahoehoe	Ariamnes	zAri	juvenile	unknown	0.837	0.63	10.06	84	4.53	49.9	0.42	-27.39	4.96	3.165	yes
0324LA.ARI03	2015	dzAr	Laupahoehoe	Ariamnes	zAri	adult	female	1.069	0.963	12.02	128	4.68	44.51	0.48	-26.93	3.7	5.256	yes
0324LA.ARI04	2015	dzAr	Laupahoehoe	Ariamnes	zAri	adult	female	2.831	1.069	11.47	171	5.14	48.49	0.72	-26.42	4.23	7.645	yes
0324LA.ARI05	2015	dzAr	Laupahoehoe	Ariamnes	zAri	adult	female	2.372	0.969	10.57	249	4.93	46.86	1.1	-26.59	4.43	5.754	yes
0324LA.BRE01	2015	dspin	Laupahoehoe	brevignatha	spiny	juvenile	unknown	1.652	1.35	9.88	163	2.03	52.86	0.87	-28.01	5.35	6.241	yes
0324LA.BRE02	2015	dspin	Laupahoehoe	brevignatha	spiny	adult	female	6.873	1.515	11.44	190	3.69	51.88	0.86	-26.94	4.53	7.135	yes
0324LA.BRE03	2015	dspin	Laupahoehoe	brevignatha	spiny	adult	male	3.465	1.234	12.32	185	1.85	47.59	0.71	-26.43	3.86	5.874	yes
0324LA.BRE04	2015	dspin	Laupahoehoe	brevignatha	spiny	juvenile	unknown	1.588	1.141	11	175	2.2	47.37	0.75	-27.43	4.31	4.199	yes
0324LA.BRE05	2015	dspin	Laupahoehoe	brevignatha	spiny	juvenile	unknown	1.183	1.012	10.59	125	2.79	45.56	0.54	-28.47	4.3	3.868	yes
0324LA06	2015	dweb	Laupahoehoe	goldendome	web	juvenile	male	0.543	0.793	10.3	56	4.25	49.32	0.27	-26.43	4.79	2.481	yes
0324LA07	2015	dweb	Laupahoehoe	goldendome	web	adult	female	0.485	0.906	10.17	49	4.84	43.9	0.21	-26.45	4.32	2.843	yes
0324LA09	2015	dweb	Laupahoehoe	goldendome	web	adult	female	0.542	0.808	10.48	57	2.65	46.75	0.25	-27	4.46	2.593	yes
0324LA10	2015	dweb	Laupahoehoe	goldendome	web	adult	female	0.774	0.892	10.35	80	4.85	43.7	0.34	-26.73	4.22	3.073	yes
0326PU.ARI02	2015	azAri	PuuMak	Ariamnes	zAri	adult	female	1.942	0.99	10.23	199	-1.16	47.5	0.92	-26.17	4.64	6.973	yes
0326PU.BRE01	2015	aspin	PuuMak	brevignatha	spiny	adult	female	5.886	1.532	11.78	186	-4.5	49.84	0.79	-27.16	4.23	6.681	yes
0326PU.BRE02	2015	aspin	PuuMak	brevignatha	spiny	juvenile	unknown	0.459	0.731	12.13	56	-4.41	46.17	0.21	-26.96	3.81	2.565	yes
0326PU.QUA01	2015	aspin	PuuMak	quasimodo	spiny	juvenile	unknown	0.792	1.112	11.09	88	-5.78	46.79	0.37	-26.23	4.22	3.004	yes
0326PU02	2015	aweb	PuuMak	hawaiensis	web	juvenile	male	2.516	1.194	9.88	177	-2.33	52.1	0.93	-27.26	5.27	4.754	yes
0326PU09	2015	aweb	PuuMak	hawaiensis	web	adult	female	4.471	1.446	10.55	162	-2.32	43.65	0.67	-26.01	4.14	6.88	yes
0326PU12	2015	aweb	PuuMak	goldendome	web	juvenile	female	0.475	0.822	10.49	50	-3.84	50.24	0.24	-27.49	4.79	2.58	yes
0326PU13	2015	aweb	PuuMak	goldendome	web	adult	female	0.714	0.862	9.54	68	-2.54	45.77	0.33	-26.37	4.8	2.874	yes
0326PU14	2015	aweb	PuuMak	hawaiensis	web	juvenile	unknown	2.874	1.056	9.82	160	-2.96	49.59	0.81	-26.26	5.05	5.1	yes
0326PU15	2015	aweb	PuuMak	goldendome	web	adult	female	1.116	0.892	9.87	110	-0.96	48.18	0.54	-26.95	4.88	3.181	yes
0327PU.ANU01	2015	aspin	PuuMak	anuenue	spiny	adult	female	3.739	1.059	10.73	170	-5.09	50.03	0.79	-27.11	4.66	4.429	yes
0327PU.ARI02	2015	azAri	PuuMak	Ariamnes	zAri	juvenile	unknown	1.06	0.82	9.69	103	-1.75	49.39	0.52	-26.03	5.1	6.693	yes
0327PU.ARI03	2015	azAri	PuuMak	Ariamnes	zAri	adult	male	1.151	0.868	11	127	-0.46	48.02	0.55	-26.44	4.37	6.711	yes
0327PU.ARI04	2015	azAri	PuuMak	Ariamnes	zAri	adult	female	1.602	1.154	10.68	171	-1.99	50.42	0.81	-26.34	4.72		yes
0327PU.ARI05	2015	azAri	PuuMak	Ariamnes	zAri	adult	female	3.406	0.983	10.89	178	-2.31	54.68	0.9	-26.4	5.02	7.003	yes
0327PU.ARI07	2015	azAri	PuuMak	Ariamnes	zAri	adult	female	0.971	1	11.71	114	-1.95	45.16	0.44	-25.92	3.86		yes
0327PU.BRE01	2015	aspin	PuuMak	brevignatha	spiny	juvenile	unknown	0.944	0.96	10.72	101	-4.87	45.07	0.43	-27.33	4.21	3.68	yes
0327PU.QUA01	2015	aspin	PuuMak	quasimodo	spiny	juvenile	male	4.777	1.446	10.63	188	-5.81	52.17	0.92	-26.34	4.91	6.113	yes
0327PU.QUA02	2015	aspin	PuuMak	quasimodo	spiny	juvenile	male	5.089	1.594	10.51	174	-6.49	47.23	0.78	-26.19	4.49	7.233	yes
0327PU.QUA03	2015	aspin	PuuMak	quasimodo	spiny	juvenile	unknown	1.952	1.577	9.43	184	-2.79	46.44	0.91	-27.63	4.93	6.422	yes
0327PU.QUA04	2015	aspin	PuuMak	quasimodo	spiny	juvenile	unknown	6.751	1.697	9.92	152	-6.81	51.26	0.79	-26.23	5.17	6.949	yes
0327PU11	2015	aweb	PuuMak	goldendome	web	juvenile	female	0.494	0.747	9.67	48	-3.6	49.13	0.24	-26.94	5.08	2.357	yes
0327PU12	2015	aweb	PuuMak	goldendome	web	adult	female	0.579	0.861	11.09	64	-2.65	47.88	0.28	-26.59	4.32	2.674	yes
0327PU13	2015	aweb	PuuMak	goldendome	web	adult	female	0.796	0.905	10.12	81	-3.3	47.2	0.38	-26.8	4.66	3.079	yes
0327PU17	2015	aweb	PuuMak	hawaiensis	web	juvenile	male	3.451	1.094	10.67	180	-0.23	51.38	0.87	-24.69	4.82	5.168	yes
0327PU19	2015	aweb	PuuMak	perkinsi	web	juvenile	unknown	3.15	1.175	10.73	156	-2.56	48.07	0.7	-26.85	4.48	5.167	yes
0327PU20	2015	aweb	PuuMak	perkinsi	web	juvenile	male	4.119	1.495	11.27	168	-2.13	45.13	0.67	-26.17	4	6.44	yes
0328PU.ANU01	2015	aspin	PuuMak	anuenue	spiny	juvenile	male	0.512	0.862	11.18	57	-5.35	46.33	0.24	-27.63	4.15	2.562	yes
0328PU.ANU02	2015	aspin	PuuMak	anuenue	spiny	juvenile	male	1.311	0.952	10.57	139	-4.94	46.29	0.61	-26.12	4.38	3.738	yes
0328PU.ANU03	2015	aspin	PuuMak	anuenue	spiny	adult	female	1.983	1.014	10.69	148	-3.65	48.8	0.68	-28.01	4.56	3.819	yes
0328PU.ARI01	2015	azAri	PuuMak	Ariamnes	zAri	adult	male	0.611	0.853	10.66	65	0.57	48.17	0.29	-26.6	4.52	4.163	yes
0328PU.ARI03	2015	azAri	PuuMak	Ariamnes	zAri	adult	female	3.674	0.911	11.27	180	-1.23	53.87	0.86	-26.62	4.78	9.25	yes
0328PU.ARI04	2015	azAri	PuuMak	Ariamnes	zAri	adult	female	2.512	0.92	11.36	237	1.28	45.1	0.94	-25.99	3.97	7.237	yes
0328PU.QUA01	2015	aspin	PuuMak	quasimodo	spiny	juvenile	unknown	8.479	1.666	9.71	149	-4.96	50.45	0.77	-26.94	5.2	6.864	yes
0328PU04	2015	aweb	PuuMak	goldendome	web	juvenile	male	0.31	0.768	11.13	34	-3.32	48.88	0.15	-27.24	4.39	2.13	yes
0328PU05	2015	aweb	PuuMak	goldendome	web	juvenile	unknown	0.368	0.778	11.71	43	-2.53	45.51	0.17	-26.4	3.89	2.316	yes
0328PU06	2015	aweb	PuuMak	goldendome	web	adult	female	0.741	0.918	8.91	66	-3.53	48.1	0.36	-28.59	5.4	2.989	yes
0328PU12	2015	aweb	PuuMak	hawaiensis	web	juvenile	unknown	2.681	1.131	10.71	133	-0.57	46.95	0.58	-25.48	4.38	5.239	yes
0328PU18	2015	aweb	PuuMak	goldendome	web	adult	female	0.839	0.913	10.65	89	-2.97	44.75	0.38	-26.75	4.2	3.08	yes
0401PU.ANU01	2015	aspin	PuuMak	anuenue	spiny	adult	female	2.681	1.114	8.95	142	-4.17	49.71	0.79	-27.09	5.55	4.159	yes
0401PU.QUA01	2015	aspin	PuuMak	quasimodo	spiny	juvenile	male	1.949	1.424	10.09	197	-6.28	51.29	1	-26.42	5.08	4.414	yes
0401PU.QUA02	2015	aspin	PuuMak	quasimodo	spiny	juvenile	unknown	1.406	1.354	10.12	142	-3.61	44.81	0.63	-26.65	4.43	5.535	yes
0401PU.QUA03	2015	aspin	PuuMak	quasimodo	spiny	adult	male	4.415	1.689	11.14	129	-4.8	46.79	0.54	-27.03	4.2	6.229	yes
0401PU.SPINY1	2015	aspin	PuuMak	anuenue	spiny	juvenile	male	1.542	0.941	9.77	151	-4.79	47.27	0.73	-27.17	4.84	3.884	yes
0401PU01	2015	aweb	PuuMak	hawaiensis	web	juvenile	unknown	1.769	1.112	11.28	83	-0.58	44.43	0.33	-25.44	3.94	4.236	yes
0401PU07	2015	aweb	PuuMak	goldendome	web	juvenile	female	0.31	0.708	10.63	33	-4.66	45.95	0.14	-26.91	4.32	1.939	yes
0401PU08	2015	aweb	PuuMak	goldendome	web	adult	female	0.565	0.823	8.7	49	-3.5	45.52	0.26	-28	5.23	2.53	yes
0401PU10	2015	aweb	PuuMak	perkinsi	web	juvenile	female	1.303	1.725	10.79	141	-2.09	45.55	0.59	-26.25	4.22	5.889	yes
0401PU11	2015	aweb	PuuMak	perkinsi	web	adult	female	18.255	2.368	11.17	167	-1.01	46.47	0.7	-26.61	4.16	10.266	yes
0401PU12	2015	aweb	PuuMak	hawaiensis	web	juvenile	female	1.734	1.187	11.63	190	-0.64	49.44	0.81	-25.78	4.25	4.725	yes
0401PU13	2015	aweb	PuuMak	perkinsi	web	adult	female	22.558	2.142	11.05	171	-1.87	50.47	0.78	-26.79	4.57	9.627	yes
0401PU17	2015	aweb	PuuMak	goldendome	web	juvenile	female	0.329	0.681	11.51	38	-4.55	46.04	0.15	-26.84	4	2.131	yes
0401PU18	2015	aweb	PuuMak	goldendome	web	adult	female	0.453	0.873	10.29	47	-2.68	47.2	0.21	-27.23	4.58	2.506	yes
0401PU19	2015	aweb	PuuMak	perkinsi	web	juvenile	unknown	3.069	1.195	9.78	142	-2.47	49.51	0.72	-26.43	5.06	4.974	yes
0401PU20	2015	aweb	PuuMak	goldendome	web	adult	female	0.609	0.844	11.36	69	-1.4	45.83	0.28	-26.31	4.03	2.783	yes
0401PU21	2015	aweb	PuuMak	goldendome	web	adult	female	0.711	0.848	11.02	78	-2.79	47.04	0.33	-27.04	4.27	2.896	yes
0402LA.ANU01	2015	dspin	Laupahoehoe	anuenue	spiny	adult	female	2.533	1.123	10.59	176	3.77	51.9	0.86	-28.99	4.9	4.305	yes
0402LA.ANU02	2015	dspin	Laupahoehoe	anuenue	spiny	juvenile	male	1.572	0.98	10.07	158	2.12	50.11	0.79	-28.38	4.98	3.822	yes
0402LA05	2015	dweb	Laupahoehoe	goldendome	web	adult	female	1.207	0.947	9.87	119	2.14	45.92	0.55	-26.09	4.65	3.524	yes
0402LA11	2015	dweb	Laupahoehoe	goldendome	web	adult	female	0.764	0.811	9.34	71	1.17	48.56	0.37	-27.22	5.2	2.683	yes
0402LA12	2015	dweb	Laupahoehoe	goldendome	web	juvenile	male	0.606	0.811	9.21	56	3.15	49.69	0.3	-27.32	5.4	2.752	yes
0402LA15	2015	dweb	Laupahoehoe	goldendome	web	juvenile	male	0.45	0.736	9.62	43	5.06	47.91	0.22	-26.59	4.98	2.321	yes
0403LA.ANU01	2015	dspin	Laupahoehoe	anuenue	spiny	adult	female	3.636	1.24	10.51	167	3.03	50.91	0.81	-28.88	4.85	4.851	yes
0403LA01	2015	dweb	Laupahoehoe	goldendome	web	juvenile	male	0.769	0.802	9.43	73	2.37	48.84	0.38	-25.8	5.18	2.827	yes
0403LA04	2015	dweb	Laupahoehoe	goldendome	web	juvenile	male	0.573	0.869	9.87	57	2.93	47.43	0.27	-26.8	4.81	2.757	yes
0403LA09	2015	dweb	Laupahoehoe	goldendome	web	adult	female	1.75	0.919	9.37	164	4.14	55.46	0.97	-27.03	5.92	3.561	yes
0403LA10	2015	dweb	Laupahoehoe	goldendome	web	juvenile	male	0.651	0.78	9.2	60	3.09	47.19	0.31	-27.01	5.13	2.713	yes
0403LA12	2015	dweb	Laupahoehoe	goldendome	web	adult	female	1.268	0.982	9.77	124	5	47.38	0.6	-26.43	4.85	3.393	yes
0403LA17	2015	dweb	Laupahoehoe	goldendome	web	juvenile	male	0.737	0.805	9.77	72	2.67	47.99	0.35	-25.06	4.91	2.814	yes
0406LA.ANU01	2015	dspin	Laupahoehoe	anuenue	spiny	juvenile	unknown	1.891	1.07	10.16	192	3.06	46.12	0.87	-28.39	4.54	3.857	yes
0406LA.ANU02	2015	dspin	Laupahoehoe	anuenue	spiny	adult	female	2.407	1.176	10.33	233	2.19	46.35	1.04	-28.09	4.49	4.278	yes
0406LA01	2015	dweb	Laupahoehoe	goldendome	web	adult	female	0.662	0.846	9.07	60	2.67	44.84	0.3	-26.04	4.94	2.844	yes
0406LA03	2015	dweb	Laupahoehoe	goldendome	web	adult	female	0.606	0.843	10.83	66	2.41	46.81	0.28	-26.73	4.32	2.825	yes
0406LA06	2015	dweb	Laupahoehoe	goldendome	web	juvenile	male	0.581	0.809	9.92	58	2.37	47.51	0.28	-25.95	4.79	2.614	yes
0406LA08	2015	dweb	Laupahoehoe	goldendome	web	juvenile	male	0.627	0.82	9.82	62	3.01	49.91	0.31	-25.91	5.08	2.748	yes
0406LA15	2015	dweb	Laupahoehoe	goldendome	web	juvenile	male	0.702	0.87	9.74	68	2.14	47.03	0.33	-25.59	4.83	2.863	yes
0413OL.ARI02	2015	czAr	Olaa	Ariamnes	zAri	adult	female	3.786	1.002	11.48	185	3.5	52.97	0.86	-24.81	4.61	8.616	yes
0413OL02	2015	cweb	Olaa	elongate	web	adult	male	3.19	1.42	10.81	170	1.51	45.98	0.72	-24.8	4.25	5.837	yes
0413OL03	2015	cweb	Olaa	goldendome	web	adult	female	0.442	0.915	13.4	59	1.86	51.25	0.23	-25.44	3.82	2.804	yes
0413OL04	2015	cweb	Olaa	hawaiensis	web	adult	female	10.178	1.501	11.33	168	4.08	50.73	0.75	-24.53	4.48	7.805	yes
0413OL05	2015	cspin	Olaa	anuenue	spiny	adult	male	1.047	1.02	11.61	122	0.75	44.75	0.47	-26.13	3.85	3.744	yes
0413OL06	2015	cweb	Olaa	goldendome	web	adult	male	0.481	0.823	12.12	58	0.93	46.83	0.23	-25.97	3.86	2.465	yes
0413OL07	2015	cweb	Olaa	hawaiensis	web	adult	female	3.581	1.403	11.37	190	1.85	51.46	0.86	-24.69	4.52	5.985	yes
0413OL08	2015	cweb	Olaa	goldendome	web	adult	female	0.41	0.923	11.72	48	0.84	47.33	0.19	-25.55	4.04	2.685	yes
0413OL09	2015	cspin	Olaa	anuenue	spiny	adult	male	1.257	1.063	10.79	136	0.78	46.96	0.59	-27.75	4.35	3.851	yes
0413OL11	2015	cweb	Olaa	perkinsi	web	adult	female	14.582	2.155	11.83	186	2.65	50	0.79	-25.08	4.23	9.923	yes
0413OL12	2015	cspin	Olaa	anuenue	spiny	adult	male	1.107	1.075	11.2	124	-0.13	45.74	0.51	-25.73	4.09	3.477	yes
0413OL13	2015	cweb	Olaa	goldendome	web	adult	female	1.039	0.893	11.47	119	2.22	48.23	0.5	-26.4	4.2	3.205	yes
0413OL14	2015	cspin	Olaa	anuenue	spiny	adult	male	1.525	1.067	11.29	172	4.09	48.48	0.74	-23.78	4.29	3.618	yes
0414OL.ANU01	2015	cspin	Olaa	anuenue	spiny	juvenile	unknown	1.224		10.7	131	-1.49	44.34	0.54	-26.57	4.15		yes
0414OL.ANU03	2015	cspin	Olaa	anuenue	spiny	adult	male	1.04	1.012	11.46	119	0.35	44.77	0.47	-25.8	3.91	3.418	yes
0414OL.ANU05	2015	cspin	Olaa	anuenue	spiny	adult	male	1.069	1.102	10.19	109	-0.07	44.97	0.48	-26.78	4.41	3.474	yes
0414OL.ANU06	2015	cspin	Olaa	anuenue	spiny	adult	female	2.079	1.062	9.29	193	-0.43	46.61	0.97	-27.33	5.02	3.89	yes
0414OL.ANU07	2015	cspin	Olaa	anuenue	spiny	juvenile	male	1.139	0.932	10.49	119	0.02	45.52	0.52	-26.24	4.34	3.386	yes
0414OL.ANU08	2015	cspin	Olaa	anuenue	spiny	adult	male	1.07	1.101	10.05	107	-0.45	46.02	0.49	-27.04	4.58	3.463	yes
0414OL.ARI02	2015	czAr	Olaa	Ariamnes	zAri	adult	female	3.625	1.138	12.01	95	4.15	46.95	0.37	-24.41	3.91		yes
0414OL.SPINY1	2015	cspin	Olaa	anuenue	spiny	juvenile	male	0.96	0.917	11.59	111	-0.68	44.13	0.42	-26.27	3.81	3.505	yes
0414OL01	2015	cweb	Olaa	perkinsi	web	juvenile	unknown	2.99	1.306	11.23	172	0.38	48.58	0.74	-25.63	4.33	5.332	yes
0414OL03	2015	cweb	Olaa	goldendome	web	adult	female	0.988	0.979	11.39	113	-0.09	45.87	0.45	-25.39	4.03	3.323	yes
0414OL04	2015	cweb	Olaa	goldendome	web	adult	female	1.194	0.884	10.46	125	2.93	44.1	0.53	-24.59	4.22	3.383	yes
0414OL05	2015	cweb	Olaa	hawaiensis	web	juvenile	unknown	0.676	0.902	12.06	82	2	43.9	0.3	-23.75	3.64	3.241	yes
0414OL06	2015	cweb	Olaa	hawaiensis	web	juvenile	unknown	0.438	0.721	10.07	44	1.28	48.6	0.21	-25.87	4.82	2.084	yes
0414OL07	2015	cweb	Olaa	perkinsi	web	adult	female	12.845	2.093	11.89	215	4.33	46.6	0.84	-24.63	3.92	9.079	yes
0414OL08	2015	cweb	Olaa	goldendome	web	adult	female	0.876	0.914	11.44	100	1.59	45.48	0.4	-24.47	3.97	3.323	yes
0414OL09	2015	cweb	Olaa	hawaiensis	web	juvenile	unknown	0.853	0.887	11.87	101	2.13	43.17	0.37	-23.05	3.64	3.549	yes
0414OL10	2015	cweb	Olaa	goldendome	web	adult	female	0.799	0.91	11.43	91	1.93	44.59	0.36	-24.59	3.9	2.917	yes
0415OL.ANU01	2015	cspin	Olaa	anuenue	spiny	adult	male	1.099	1.024	11.83	130	0.2	45.17	0.5	-26.37	3.82	3.751	yes
0415OL.ARI01	2015	czAr	Olaa	Ariamnes	zAri	adult	female	2.778	0.995	11.56	112	4.39	46.73	0.45	-24.06	4.04	8.151	yes
0415OL.ARI03	2015	czAr	Olaa	Ariamnes	zAri	adult	female	2.622	0.986	10.77	152	4.76	48.79	0.69	-25.23	4.53	7.098	yes
0415OL.ARI04	2015	czAr	Olaa	Ariamnes	zAri	adult	female	2.887	1.038	12.26	139	3.62	49.8	0.57	-25.56	4.06		yes
0415OL.ARI05	2015	czAr	Olaa	Ariamnes	zAri	adult	female	2.576	1.013	12.02	304	3.49	45.99	1.16	-25.09	3.83	7.477	yes
0415OL.ARI06	2015	czAr	Olaa	Ariamnes	zAri	adult	female	2.976	1.005	11.85	178	4.97	48.46	0.73	-24.77	4.09	6.844	yes
0415OL.UNK01	2015	cspin	Olaa	anuenue	spiny	adult	male	0.946	1.104	11.58	110	-0.11	44.78	0.42	-26.38	3.87	3.564	yes
0415OL.UNK02	2015	cspin	Olaa	anuenue	spiny	adult	male	1.107	0.985	11.28	125	0	45.86	0.51	-26.77	4.06	3.605	yes
0415OL01	2015	cweb	Olaa	goldendome	web	adult	female	0.64	0.892	11.69	75	1.57	46.12	0.3	-25.35	3.94	2.824	yes
0415OL05	2015	cweb	Olaa	goldendome	web	adult	female	0.707	0.947	11.39	81	0.31	45.4	0.32	-25.46	3.99	3.071	yes
0415OL06	2015	cweb	Olaa	goldendome	web	adult	female	0.67	0.866	12.11	81	0.81	46.5	0.31	-25.25	3.84	2.93	yes
0416OL.ARI01	2015	czAr	Olaa	Ariamnes	zAri	unknown	unknown	1.195	1.024	12.06	144	0.73	46.46	0.56	-25.26	3.85	5.266	yes
0416OL.ARI02	2015	czAr	Olaa	Ariamnes	zAri	adult	female	2.489	1.109	11.42	160	5.22	45.17	0.63	-24.1	3.95	8.135	yes
0417OL16	2015	cweb	Olaa	goldendome	web	adult	female	0.671	0.865	11.13	75	0.95	44.75	0.3	-25.34	4.02	2.762	yes
0417OL20	2015	cweb	Olaa	goldendome	web	adult	female	0.613	0.893	12.46	76	1.67	45.82	0.28	-24.89	3.68	2.882	yes
0417OL23	2015	cweb	Olaa	goldendome	web	adult	female	1.162	1.032	11.57	134	0.87	45.54	0.53	-25.41	3.94	3.606	yes
0417OL26	2015	cweb	Olaa	hawaiensis	web	juvenile	unknown	2.921	1.195	11.07	219	3.56	45.92	0.91	-23.85	4.15	5.338	yes
0417OL27	2015	cweb	Olaa	goldendome	web	adult	female	0.717	0.865	12.13	87	2.09	46.55	0.33	-24.94	3.84	2.939	yes
0418OL.QUA01	2015	cspin	Olaa	quasimodo	spiny	juvenile	male	5.952	1.506	9.9	167	-0.79	47.95	0.81	-26.04	4.84	6.811	yes
0418OL10	2015	cweb	Olaa	goldendome	web	adult	female	0.746	0.872	10.94	82	2.98	44.94	0.34	-25.75	4.11	2.926	yes
0418OL11	2015	cweb	Olaa	goldendome	web	adult	female	0.529	0.917	12.37	65	2.98	45.21	0.24	-25.34	3.65	2.714	yes
0418OL12	2015	cweb	Olaa	perkinsi	web	adult	male	6.706	1.814	10.3	168	1.64	50.27	0.82	-25.85	4.88	7.097	yes
0418OL13	2015	cweb	Olaa	hawaiensis	web	adult	male	4.014	1.411	9.1	134	2.97	43.27	0.64	-24.31	4.75	6.491	yes
0418OL14	2015	cweb	Olaa	perkinsi	web	juvenile	male	7.575	1.616	10.63	201	1.87	53.32	1.01	-23.67	5.02	7.91	yes
0418OL15	2015	cweb	Olaa	goldendome	web	adult	female	0.77	0.849	10.83	83	1	44.2	0.34	-24.96	4.08	3.055	yes
SK01	2015	cpla	Olaa	Coprosma	plant			5.958		2.04	121	0.01	42.94	2.56	-30.22	21.06		no
SK02	2015	cpla	Olaa	dead.Cibotium	plant			5.997		1.02	61	-5.03	42.85	2.57	-28.17	42.17		no
SK03	2015	cpla	Olaa	Broussaisia	plant			6.026		1.12	67	-2.24	37.37	2.25	-32.45	33.38		no
SK04	2015	cpla	Olaa	Perrotettia	plant			6.004		2.54	153	-2.72	42.52	2.55	-32.2	16.74		no
SK05	2015	cpla	Olaa	Cibotium	plant			5.958		1.09	65	-3.96	43.32	2.58	-28.04	39.65		yes
SK06	2015	cpla	Olaa	Metrosideros	plant			6.018		1.23	74	-1.17	46.39	2.79	-30.49	37.81		yes
SK07	2015	cpla	Olaa	Cheirodendron	plant			5.972		1.68	100	-3.86	42.04	2.51	-32.13	25.08		yes
SK08	2015	apla	PuuMak	Coprosma	plant			6.074		1.39	84	-3.72	42.89	2.6	-31.92	30.94		no
SK09	2015	apla	PuuMak	Coprosma	plant			6.032		1.05	63	-5.74	41.18	2.48	-32.63	39.18		no
SK11	2015	apla	PuuMak	Broussaisia	plant			5.985		1.22	73	-5.71	37.91	2.27	-31.03	31.08		no
SK12	2015	apla	PuuMak	Dicranopteris	plant			5.983		1.25	75	-7.98	45.08	2.7	-28.99	36.2		no
SK13	2015	apla	PuuMak	Broussaisia	plant			6.013		1.05	63	-6.19	35.59	2.14	-32.36	33.86		no
SK14	2015	apla	PuuMak	Perrotettia	plant			6.006		1.75	105	-6.69	41.01	2.46	-31.53	23.44		no
SK15	2015	apla	PuuMak	Cibotium	plant			6.069		1.65	100	-8.56	45.23	2.75	-28.64	27.39		yes
SK17	2015	apla	PuuMak	Metrosideros	plant			5.964		0.82	49	-10.02	44.28	2.64	-30.97	53.71		yes
SK18	2015	dpla	Laupahoehoe	Rubus	plant			5.963		2.7	161	-0.42	43.31	2.58	-29.89	16.06		no
SK19	2015	dpla	Laupahoehoe	Cheirodendron	plant			5.972		2.06	123	0.88	44.09	2.63	-32.31	21.41		yes
SK20	2015	dpla	Laupahoehoe	Acacia	plant			5.928		1.86	110	1.14	48.02	2.85	-27.5	25.84		no
SK21	2015	dpla	Laupahoehoe	Metrosideros	plant			6.081		1.03	63	0.49	44.96	2.73	-32.33	43.71		yes
SK22	2015	dpla	Laupahoehoe	Ilex	plant			6.043		1.48	90	-0.85	43.52	2.63	-32.59	29.35		no
SK23	2015	dpla	Laupahoehoe	Freycinetia	plant			5.922		1.28	76	0.22	40.69	2.41	-30.82	31.74		no
SK24	2015	dpla	Laupahoehoe	Asplenium	plant			5.979		3.08	184	0.05	42.23	2.52	-32.58	13.69		no
SK25	2015	dpla	Laupahoehoe	Ilex	plant			6.089		1.22	75	0.93	44.63	2.72	-31.06	36.47		no
SK28	2015	dpla	Laupahoehoe	Cibotium	plant			5.974		2.02	120	-0.26	47.07	2.81	-30.33	23.35		yes
SK29	2015	dpla	Laupahoehoe	Asplenium	plant			5.936		2.08	124	-0.52	44.05	2.61	-27.11	21.15		no
SK30	2015	dpla	Laupahoehoe	Rubus	plant			5.969		2.68	160	0.09	41.67	2.49	-31.57	15.52		no
SK31	2015	apla	PuuMak	Cheirodendron	plant			5.989		1.89	113	-12.18	40.26	2.41	-31.23	21.28		yes
SK32	2015	apla	PuuMak	Dicranopteris	plant			5.986		1.3	78	-8.6	46.9	2.81	-28.09	36.21		no
160206ARE79B	2016	bweb	Waiakea	hawaiensis	web	juvenile	male	2.003	1.117	10.51	211	-0.18	45.56	0.91	-25.11			yes
160206ARE141B	2016	bweb	Waiakea	hawaiensis	web	juvenile	unknown	1.183	0.95	10	118	-3.09	43.46	0.51	-25.07			yes
160206SK02	2016	bweb	Waiakea	goldendome	web	juvenile	female	0.365	0.735	10.21	37	-0.47	45.89	0.17	-26.21			yes
160206SK04	2016	bweb	Waiakea	hawaiensis	web	juvenile	unknown	1.181	0.932	10.86	128	-1.4	42.86	0.51	-26.57			yes
160206SK20	2016	bweb	Waiakea	hawaiensis	web	juvenile	unknown	0.827	0.841	10.73	89	-0.53	44.25	0.37	-26.25			yes
160206SK22	2016	bweb	Waiakea	hawaiensis	web	juvenile	unknown	1.275	0.955	9.55	122	-0.05	42.76	0.55	-26.7			yes
160206SK25	2016	bzAri	Waiakea	Ariamnes	zAri	juvenile	unknown	0.516	0.628	9.8	51	-0.84	50.33	0.26	-27			yes
160206SK27	2016	bzAri	Waiakea	Ariamnes	zAri	adult	male	0.764	0.842	11.42	87	-1.25	47.6	0.36	-25.12			yes
160206SK34	2016	bweb	Waiakea	goldendome	web	juvenile	female	0.435	0.708	10.09	44	-1.75	45.24	0.2	-26.5			yes
160206SK35	2016	bspin	Waiakea	brevignatha	spiny	adult	male	2.605		11.47	299	-3.48	45.37	1.18	-26.08			yes
160206SK37	2016	bweb	Waiakea	perkinsi	web	juvenile	male	4.951		9.94	168	-0.41	45.3	0.76	-25.26			yes
160206SK41	2016	bweb	Waiakea	perkinsi	web	juvenile	unknown	0.798		8.81	70	-1.83	47.45	0.38	-26.28			yes
160206SK43	2016	bweb	Waiakea	hawaiensis	web	juvenile	unknown	0.693	0.788	8.86	61	-3.27	42.86	0.3	-26.46			yes
160206SK54	2016	bzAri	Waiakea	Ariamnes	zAri	juvenile	unknown	1.205	0.844	10.93	132	-0.29	45.1	0.54	-25.3			yes
160206SK58	2016	bweb	Waiakea	goldendome	web	juvenile	male	0.412	0.824	11.52	47	-1.6	45.38	0.19	-25.15			yes
160206SK60	2016	bweb	Waiakea	goldendome	web	juvenile	male	0.697	0.804	9.5	66	-1.54	47.59	0.33	-24.91			yes
160206SK64	2016	bweb	Waiakea	hawaiensis	web	juvenile	unknown	0.863	0.865	10.09	87	-3.33	44.19	0.38	-25.08			yes
160206SK66	2016	bweb	Waiakea	hawaiensis	web	juvenile	unknown	0.911	0.969	10.92	100	-1.47	43.01	0.39	-25.5			yes
160206SK67	2016	bspin	Waiakea	anuenue	spiny	juvenile	unknown	0.525	0.783	8.99	47	-5.14	47.39	0.25	-27			yes
160206SK70	2016	bweb	Waiakea	goldendome	web	juvenile	male	0.715	0.792	10.04	72	-0.79	46.53	0.33	-25.81			yes
160206SK76	2016	bweb	Waiakea	hawaiensis	web	juvenile	male	3.579	1.065	10.9	151	0.37	46.64	0.64	-25.4			yes
160206SK78	2016	bweb	Waiakea	hawaiensis	web	juvenile	unknown	0.497	0.84	11.55	57	-3.35	42.43	0.21	-25			yes
160206SK79	2016	bweb	Waiakea	goldendome	web	juvenile	male	0.496	0.757	9.34	46	-1	48.58	0.24	-26.01			yes
160206SK80	2016	bweb	Waiakea	hawaiensis	web	juvenile	unknown	1.215	0.853	10.33	126	-0.29	42.3	0.51	-23.77			yes
160206SK81	2016	bspin	Waiakea	quasimodo	spiny	juvenile	female	0.852	1.045	10.31	88	-3.8	50.43	0.43	-26.58			yes
160206SK83	2016	bspin	Waiakea	brevignatha	spiny	juvenile	unknown	0.241		9.76	24	-3.54	44.63	0.11	-26.73			yes
160206SK84	2016	bweb	Waiakea	goldendome	web	adult	female	0.865	0.958	10.69	92	-1.86	46.45	0.4	-28.42			yes
160206SK85	2016	bweb	Waiakea	goldendome	web	juvenile	female	0.597	0.777	9.53	57	-2.65	45.42	0.27	-26.61			yes
160207CG31	2016	bspin	Waiakea	quasimodo	spiny	juvenile	male	0.528	0.928	11	58	-3.46	47.95	0.25	-26.41			yes
160207CG32	2016	bspin	Waiakea	brevignatha	spiny	juvenile	unknown	0.319		10.53	34	-3.87	49.61	0.16	-27.28			yes
160207CG34	2016	bweb	Waiakea	perkinsi	web	juvenile	unknown	2.086		10.45	218	-1.2	44.61	0.93	-27.88			yes
160207CG35	2016	bweb	Waiakea	goldendome	web	adult	female	0.645	0.969	11.31	73	-0.04	46.27	0.3	-26.81			yes
160207CG36	2016	bspin	Waiakea	anuenue	spiny	juvenile	female	1.722	1.068	9.65	166	-3.59	50.53	0.87	-27.51			yes
160207CG37	2016	bweb	Waiakea	hawaiensis	web	juvenile	unknown	0.604	0.824	10.59	64	-1.94	44.96	0.27	-24.52			yes
160207SK02	2016	bweb	Waiakea	hawaiensis	web	juvenile	unknown	0.369	0.707	10.88	40	-2.33	45.4	0.17	-24.67			yes
160207SK04	2016	bweb	Waiakea	goldendome	web	juvenile	male	0.605	0.813	10.19	62	-1.41	45.53	0.28	-24.79			yes
160207SK13	2016	bweb	Waiakea	goldendome	web	juvenile	female	0.487	0.751	9.96	49	0.61	46.46	0.23	-26.25			yes
160207SK15	2016	bzAri	Waiakea	Ariamnes	zAri	juvenile	unknown	0.739	0.868	11.74	87	1.47	46.35	0.34	-25.84			yes
160207SK18	2016	bweb	Waiakea	hawaiensis	web	juvenile	unknown	0.382	0.702	11.23	43	-1.84	45.56	0.17	-26.36			yes
160207SK19	2016	bweb	Waiakea	hawaiensis	web	juvenile	unknown	2.346	1.112	10.34	243	0.31	43.24	1.01	-26.74			yes
160207SK24	2016	bweb	Waiakea	goldendome	web	juvenile	female	0.806	0.866	9.21	74	-1.96	52.57	0.42	-26.05			yes
160207SK27	2016	bweb	Waiakea	perkinsi	web	juvenile	unknown	0.707		10.38	73	-3.47	46.33	0.33	-26.87			yes
160208CG096	2016	bspin	Waiakea	quasimodo	spiny	juvenile	unknown	4.074	1.446	9.64	168	-4.74	49.58	0.86	-25.83			yes
160208CG097	2016	bweb	Waiakea	goldendome	web	adult	female	0.584	0.856	9.64	56	-1.76	44.87	0.26	-25.86			yes
160208CG099	2016	bweb	Waiakea	goldendome	web	adult	female	0.633	0.995	11.13	70	-3.37	47.62	0.3	-25.72			yes
160208CG100	2016	bweb	Waiakea	perkinsi	web	juvenile	unknown	2.819		9.99	175	-1.45	46.45	0.81	-25.16			yes
160208CG101	2016	bweb	Waiakea	goldendome	web	juvenile	female	0.537	0.83	10.74	58	-2.39	46.53	0.25	-25.2			yes
160208SK019	2016	bweb	Waiakea	goldendome	web	adult	female	0.578	0.922	10.13	59	-2.83	45.83	0.26	-24.8			yes
160208SK029	2016	bweb	Waiakea	goldendome	web	juvenile	female	0.601	0.851	10.08	61	-2.22	44.98	0.27	-25.52			yes
160208SK036	2016	bweb	Waiakea	perkinsi	web	juvenile	unknown	1.105		11.69	129	-4.43	42.6	0.47	-25.04			yes
160208SK037	2016	bspin	Waiakea	brevignatha	spiny	adult	female	2.575		11.05	284	-3.69	45.92	1.18	-26.8			yes
160208SK040	2016	bzAri	Waiakea	Ariamnes	zAri	juvenile	unknown	0.459	0.668	10.45	48	-1.17	46.89	0.22	-26.18			yes
160208SK041	2016	bweb	Waiakea	hawaiensis	web	juvenile	unknown	0.571	0.869	11.6	66	-2.22	43.76	0.25	-25.28			yes
160208SK048	2016	bweb	Waiakea	goldendome	web	adult	female	0.656	0.905	10.18	67	2.22	44.92	0.29	-29.4			yes
160208SK049	2016	bweb	Waiakea	perkinsi	web	juvenile	unknown	1.183		10.32	122	-1.83	43.06	0.51	-25.71			yes
160208SK054	2016	bweb	Waiakea	perkinsi	web	juvenile	unknown	0.959		7.7	74	-3.78	43.98	0.42	-27.29			yes
160208SK066	2016	bspin	Waiakea	quasimodo	spiny	juvenile	unknown	3.925	1.439	9.91	141	-5.47	48.57	0.69	-26.96			yes
160208SK071	2016	bweb	Waiakea	goldendome	web	juvenile	female	0.379	0.771	11.68	44	-1.46	45.16	0.17	-26.59			yes
160208SK079	2016	bspin	Waiakea	quasimodo	spiny	juvenile	unknown	3.578	1.404	10.24	155	-5.35	50.56	0.77	-26.81			yes
160208SK080	2016	bspin	Waiakea	quasimodo	spiny	juvenile	unknown	0.807	0.866	8.77	71	-5.1	48.25	0.39	-26.14			yes
160208SK084	2016	bspin	Waiakea	brevignatha	spiny	juvenile	unknown	0.824		10.57	87	-3.77	45.66	0.38	-27.99			yes
160208SK085	2016	bspin	Waiakea	quasimodo	spiny	juvenile	unknown	0.819	1.027	10.06	82	-5.84	46.43	0.38	-26.26			yes
160208SK087	2016	bspin	Waiakea	quasimodo	spiny	juvenile	unknown	1.164	1.239	10.45	122	-5.25	45.81	0.53	-27.4			yes
160208SK088	2016	bweb	Waiakea	goldendome	web	juvenile	male	0.556	0.817	9.29	52	-1.85	47.27	0.26	-25.96			yes
160208SK092	2016	bweb	Waiakea	hawaiensis	web	juvenile	unknown	0.951	1.037	9.43	90	-2.43	44.02	0.42	-25.78			yes
160209ARE070E	2016	bzAri	Waiakea	Ariamnes	zAri	adult	female	3.502	1.055	10.64	184	0.85	53.99	0.93	-25.9			yes
160209ARE079E	2016	bzAri	Waiakea	Ariamnes	zAri	juvenile	male	0.732	0.762	10	73	-0.68	49.58	0.36	-26.52			yes
160209ARE106E	2016	bspin	Waiakea	anuenue	spiny	juvenile	female	2.704	1.11	10.25	156	-4.16	52.26	0.79	-28.56			yes
160209CG037	2016	bweb	Waiakea	goldendome	web	juvenile	female	0.524	0.824	10.35	54	-2.24	49.55	0.26	-26.42			yes
160209CG041	2016	bweb	Waiakea	goldendome	web	adult	female	0.747	0.849	11.02	82	-2.49	46.75	0.35	-25.79			yes
160209CG046	2016	bspin	Waiakea	anuenue	spiny	juvenile	unknown	0.691	0.868	11.01	76	-4.63	47.75	0.33	-27.02			yes
160209SK010	2016	bspin	Waiakea	quasimodo	spiny	juvenile	unknown	0.967	0.984	10.4	101	-3.11	47.83	0.46	-26.09			yes
160209SK011	2016	bspin	Waiakea	quasimodo	spiny	juvenile	unknown	0.819	0.989	9.49	78	-5.25	47.24	0.39	-25.87			yes
160209SK016	2016	bspin	Waiakea	quasimodo	spiny	adult	female	0.774	1.076	10.66	83	-3.63	46.03	0.36	-26.02			yes
160209SK026	2016	bzAri	Waiakea	Ariamnes	zAri	juvenile	unknown	0.796	0.647	10.99	87	0.06	48.76	0.39	-26.24			yes
160209SK027	2016	bweb	Waiakea	perkinsi	web	juvenile	unknown	2.609		10.76	281	-0.12	44.1	1.15	-25.69			yes
160209SK029	2016	bweb	Waiakea	hawaiensis	web	adult	female	5.718	1.667	11.36	187	-2.51	50.41	0.83	-24.09			yes
160213ARE05	2016	bweb	Waiakea	goldendome	web	adult	female	0.884	0.955	8.98	79	-0.71	43.26	0.38	-26.06			yes
160213ARE06	2016	bspin	Waiakea	anuenue	spiny	juvenile	unknown	0.612	0.882	10.73	66	-6.71	44.92	0.27	-27.62			yes
160213ARE83	2016	bzAri	Waiakea	Ariamnes	zAri	adult	female	2.839	1.004	11.33	175	-1.35	51.79	0.8	-25.76			yes
160213ARE86	2016	bweb	Waiakea	hawaiensis	web	juvenile	unknown	1.453	0.859	8.22	119	-1.4	41.99	0.61	-25.36			yes
160213SK01	2016	bspin	Waiakea	brevignatha	spiny	adult	female	3.433		9.63	188	-4.25	47.68	0.93	-26.89			yes
160213SK05	2016	bzAri	Waiakea	Ariamnes	zAri	juvenile	unknown	0.684	0.663	9.78	67	-2.1	43.59	0.3	-25.72			yes
160213SK14	2016	bspin	Waiakea	brevignatha	spiny	adult	female	4.602		10.96	173	-3.54	50.41	0.8	-26.9			yes
160213SK17	2016	bspin	Waiakea	anuenue	spiny	juvenile	unknown	0.673	0.966	11.67	79	-6.22	44.83	0.3	-26.69			yes
160213SK18	2016	bweb	Waiakea	perkinsi	web	juvenile	unknown	3.784		11.09	182	-4.5	46.86	0.77	-25.73			yes
160213SK21	2016	bweb	Waiakea	goldendome	web	adult	female	1.149	0.963	10.62	122	-2.38	47.27	0.54	-26.57			yes
160213SK23	2016	bweb	Waiakea	hawaiensis	web	juvenile	unknown	0.843	0.898	10.22	86	-1.1	41.86	0.35	-25.79			yes
160213SK24	2016	bweb	Waiakea	perkinsi	web	juvenile	unknown	1.088		10.19	111	-0.01	42.63	0.46	-27.2			yes
160213SK25	2016	bweb	Waiakea	goldendome	web	adult	female	0.866	0.941	9.71	84	1.52	46.4	0.4	-26.01			yes
160213SK26	2016	bweb	Waiakea	perkinsi	web	juvenile	unknown	3.893		10.01	162	-3.35	49.5	0.8	-26.42			yes
160213SK27	2016	bzAri	Waiakea	Ariamnes	zAri	juvenile	male	0.713	0.72	9.44	67	-1.37	48.28	0.34	-26.28			yes
160213SK28	2016	bspin	Waiakea	brevignatha	spiny	adult	male	3.307		11.81	182	-2.23	48.58	0.75	-25.67			yes
160213SK29	2016	bspin	Waiakea	brevignatha	spiny	adult	female	6.273		11.03	170	-2.5	50.29	0.78	-27.19			yes
160213SK30	2016	bspin	Waiakea	anuenue	spiny	juvenile	unknown	0.614	0.78	9.47	58	-5.92	47.07	0.29	-28.54			yes
160213SK32	2016	bspin	Waiakea	brevignatha	spiny	adult	male	2.777		10.96	184	-3.41	50.92	0.85	-26.74			yes
160213SK33	2016	bspin	Waiakea	quasimodo	spiny	juvenile	unknown	1.645	1.131	8.69	143	-5.27	46.54	0.77	-26.16			yes
160213SK34	2016	bspin	Waiakea	anuenue	spiny	juvenile	unknown	0.626	0.985	10.71	67	-5.19	47.33	0.3	-26.99			yes
160215CG12	2016	bweb	Waiakea	goldendome	web	juvenile	female	0.828	0.823	8.39	70	-1.38	45.83	0.38	-27.83			yes
160215SK02	2016	bweb	Waiakea	goldendome	web	adult	female	0.633	0.912	9.97	63	-1.17	44.62	0.28	-25.53			yes
160215SK05	2016	bzAri	Waiakea	Ariamnes	zAri	adult	male	0.633	0.835	10.73	68	-0.98	45.41	0.29	-26.62			yes
160215SK06	2016	bspin	Waiakea	anuenue	spiny	juvenile	male	1.122	0.894	8.98	101	-4.23	48	0.54	-27.31			yes
160215SK08	2016	bweb	Waiakea	goldendome	web	adult	female	0.902	0.925	10.39	94	-3.35	45.3	0.41	-26.4			yes
160215SK10	2016	bweb	Waiakea	goldendome	web	adult	female	0.941	0.903	10.05	95	-1.57	46.03	0.43	-26.28			yes
160215SK11	2016	bweb	Waiakea	goldendome	web	adult	female	1.149	0.982	9.85	113	-2.25	48.17	0.55	-26.43			yes
160215SK26	2016	aweb	PuuMak	goldendome	web	adult	female	0.506	0.904	11.31	57	-1.05	44.74	0.23	-25.61			yes
160215SK27	2016	aweb	PuuMak	goldendome	web	adult	female	0.781	0.824	10.39	81	-0.8	45.05	0.35	-27.24			yes
160215SK28	2016	aweb	PuuMak	goldendome	web	adult	female	0.698	0.909	11.03	77	-0.15	47.54	0.33	-26.6			yes
160215SK31	2016	aweb	PuuMak	goldendome	web	adult	female	1.602	0.992	9.91	159	-0.01	46.7	0.75	-27.2			yes
160215SK32	2016	aweb	PuuMak	goldendome	web	juvenile	unknown	0.593	0.793	9.92	59	-1.94	44.57	0.26	-26.81			yes
160215SK35	2016	aweb	PuuMak	goldendome	web	adult	female	0.938	0.852	9.16	86	-1.79	43.12	0.4	-26.51			yes
160215SK38	2016	aweb	PuuMak	goldendome	web	adult	female	1.242	0.858	9.27	115	-3.77	45.98	0.57	-27.39			yes
160215SK39	2016	aweb	PuuMak	goldendome	web	juvenile	female	0.478	0.766	8.46	40	-0.9	46.37	0.22	-26.8			yes
160215SK40	2016	aweb	PuuMak	goldendome	web	adult	female	0.681	0.85	9.56	65	-1.02	44.3	0.3	-25.47			yes
160215SK45	2016	aweb	PuuMak	goldendome	web	juvenile	female	0.563	0.776	10.61	60	-2.34	44.98	0.25	-26.95			yes
160215SK46	2016	aweb	PuuMak	goldendome	web	adult	female	0.602	0.87	10.35	62	-2.03	46.18	0.28	-27.59			yes
160215SK47	2016	aweb	PuuMak	goldendome	web	juvenile	unknown	0.519	0.722	9.61	50	-2.95	49.25	0.26	-26.51			yes
160215SK49	2016	aweb	PuuMak	goldendome	web	adult	female	0.612	0.855	8.58	52	-1.96	43.66	0.27	-26.86			yes
160215SK50	2016	aweb	PuuMak	goldendome	web	adult	female	1.622	0.973	10.07	163	0.12	49.66	0.81	-26.47			yes
160206CIB1	2016	bpla	Waiakea	Cibotium	plant					1.61	100	-8.31	45.59	2.84	-29.57			yes
160206MET1	2016	bpla	Waiakea	Metrosideros	plant					0.71	43	-9.65	45.31	2.75	-31.58			yes
160206VAC	2016	bpla	Waiakea	Vaccinium	plant					1.44	88	-5.39	45.29	2.76	-33.51			no
160206BROU	2016	bpla	Waiakea	Broussaisia?	plant					1.61	99	-0.98	38.63	2.37	-31.77			no
160206CHEI	2016	bpla	Waiakea	Cheirodendron	plant					1.61	96	-8.1	41.94	2.5	-31.45			yes
160206CIB2	2016	bpla	Waiakea	Cibotium	plant					2.14	135	-8.73	46.94	2.95	-28.41			yes
160206MET2	2016	bpla	Waiakea	Metrosideros	plant	sapling				0.8	47	-10.27	46.36	2.76	-31.19			yes
160215CHEI	2016	apla	PuuMak	Cheirodendron	plant					1.49	90	-8.82	43.4	2.61	-31.67			yes
160215PERR	2016	apla	PuuMak	Perrotettia	plant					1.17	69	-5.8	38.9	2.31	-30.22			no
160215CIB1	2016	apla	PuuMak	Cibotium	plant					1.48	91	-6.52	44.5	2.72	-31.26			yes
160215BROU	2016	apla	PuuMak	Broussaisia	plant					1.46	90	-5.15	38.23	2.35	-33.67			no
160215COPR	2016	apla	PuuMak	Coprosma	plant					1.28	76	-7.94	41.58	2.46	-30.93			no
160215CIB2	2016	apla	PuuMak	dead.Cibotium	plant					0.97	58	-5.22	37.34	2.24	-27.59			no
160215DICR	2016	apla	PuuMak	Dicranopteris	plant					1.27	75	-7.46	45.65	2.7	-27.56			no
160215MET1	2016	apla	PuuMak	Metrosideros	plant	sapling				0.83	51	-7.33	44.91	2.73	-30.08			yes
160215MET2	2016	apla	PuuMak	Metrosideros	plant					0.8	48	-8.86	46.37	2.79	-31.44			yes
NS161015.01	2016	bplit	Waiakea	mixed.Metrosideros.and.Cibotium	litter					0.82	48	-1.91	51.04	3.01	-28.84			yes
NS161015.02	2016	bplit	Waiakea	Metrosideros	litter					0.64	40	-1.41	52.73	3.27	-29.93			yes
NS161015.03	2016	bplit	Waiakea	mixed.Metrosideros.Cibotium.and.others	litter					0.81	51	-2.34	49.27	3.06	-27.92			yes
