# Supplementary material for: Stable isotopes of Hawaiian spiders reflect substrate properties along a chronosequence
Source: PeerJ. 2018 Mar 21;6:e4527. doi: 10.7717/peerj.4527 (PMC5866714; doi:10.7717/peerj.4527)
Supplement: Supplemental Information 6 — Original dataset was randomly subsampled so that all species are equally well represented. This is for review purposes, to demonstrate that significance of results remains unchanged with subsampling. Additionally, analyses were performed for a “species-controlled” dataset containing only the spider species that were present at all three sites. Side-by-side results of the three datasets (full, subsampled, and sp-controlled) can be found in Figs. S4–S8 [file peerj-06-4527-s017.xlsx]

## Sheet: bigislandiso_subsampled
UID	year	plot	site	taxon	category	age	sex	weight	carapace.width	percentN	ugN	delta15N	percentC	mgC	delta13C	CtoN	body.length	controlled
0403LA10	2015	dweb	Laupahoehoe	goldendome	web	juvenile	male	0.651	0.78	9.2	60	3.09	47.19	0.31	-27.01	5.13	2.713	yes	0.0212812
0406LA08	2015	dweb	Laupahoehoe	goldendome	web	juvenile	male	0.627	0.82	9.82	62	3.01	49.91	0.31	-25.91	5.08	2.748	yes	0.025238
0324LA10	2015	dweb	Laupahoehoe	goldendome	web	adult	female	0.774	0.892	10.35	80	4.85	43.7	0.34	-26.73	4.22	3.073	yes	0.0687639
0402LA05	2015	dweb	Laupahoehoe	goldendome	web	adult	female	1.207	0.947	9.87	119	2.14	45.92	0.55	-26.09	4.65	3.524	yes	0.0958031
0402LA15	2015	dweb	Laupahoehoe	goldendome	web	juvenile	male	0.45	0.736	9.62	43	5.06	47.91	0.22	-26.59	4.98	2.321	yes	0.117732
0403LA09	2015	dweb	Laupahoehoe	goldendome	web	adult	female	1.75	0.919	9.37	164	4.14	55.46	0.97	-27.03	5.92	3.561	yes	0.122523
0313LA01	2015	dweb	Laupahoehoe	goldendome	web	adult	female	0.946	0.91	9.23	87	4.1	47.61	0.45	-27.74	5.16	2.977	yes	0.165179
0315LA12	2015	dweb	Laupahoehoe	goldendome	web	adult	female	0.774	0.968	10.92	84	3.24	47.75	0.37	-27.62	4.37	3.076	yes	0.232775
0406LA15	2015	dweb	Laupahoehoe	goldendome	web	juvenile	male	0.702	0.87	9.74	68	2.14	47.03	0.33	-25.59	4.83	2.863	yes	0.283495
0403LA12	2015	dweb	Laupahoehoe	goldendome	web	adult	female	1.268	0.982	9.77	124	5	47.38	0.6	-26.43	4.85	3.393	yes	0.32034
0414OL08	2015	cweb	Olaa	goldendome	web	adult	female	0.876	0.914	11.44	100	1.59	45.48	0.4	-24.47	3.97	3.323	yes	0.0152036
0418OL10	2015	cweb	Olaa	goldendome	web	adult	female	0.746	0.872	10.94	82	2.98	44.94	0.34	-25.75	4.11	2.926	yes	0.0185887
0417OL16	2015	cweb	Olaa	goldendome	web	adult	female	0.671	0.865	11.13	75	0.95	44.75	0.3	-25.34	4.02	2.762	yes	0.129338
0417OL20	2015	cweb	Olaa	goldendome	web	adult	female	0.613	0.893	12.46	76	1.67	45.82	0.28	-24.89	3.68	2.882	yes	0.157863
0415OL01	2015	cweb	Olaa	goldendome	web	adult	female	0.64	0.892	11.69	75	1.57	46.12	0.3	-25.35	3.94	2.824	yes	0.181849
0413OL03	2015	cweb	Olaa	goldendome	web	adult	female	0.442	0.915	13.4	59	1.86	51.25	0.23	-25.44	3.82	2.804	yes	0.208729
0417OL27	2015	cweb	Olaa	goldendome	web	adult	female	0.717	0.865	12.13	87	2.09	46.55	0.33	-24.94	3.84	2.939	yes	0.221539
0413OL06	2015	cweb	Olaa	goldendome	web	adult	male	0.481	0.823	12.12	58	0.93	46.83	0.23	-25.97	3.86	2.465	yes	0.40143
0414OL03	2015	cweb	Olaa	goldendome	web	adult	female	0.988	0.979	11.39	113	-0.09	45.87	0.45	-25.39	4.03	3.323	yes	0.479435
0415OL06	2015	cweb	Olaa	goldendome	web	adult	female	0.67	0.866	12.11	81	0.81	46.5	0.31	-25.25	3.84	2.93	yes	0.491415
160213ARE05	2016	bweb	Waiakea	goldendome	web	adult	female	0.884	0.955	8.98	79	-0.71	43.26	0.38	-26.06			yes	0.0218321
160206SK70	2016	bweb	Waiakea	goldendome	web	juvenile	male	0.715	0.792	10.04	72	-0.79	46.53	0.33	-25.81			yes	0.0219402
160215SK02	2016	bweb	Waiakea	goldendome	web	adult	female	0.633	0.912	9.97	63	-1.17	44.62	0.28	-25.53			yes	0.0347275
160207SK04	2016	bweb	Waiakea	goldendome	web	juvenile	male	0.605	0.813	10.19	62	-1.41	45.53	0.28	-24.79			yes	0.0728416
160213SK21	2016	bweb	Waiakea	goldendome	web	adult	female	1.149	0.963	10.62	122	-2.38	47.27	0.54	-26.57			yes	0.0745696
160206SK85	2016	bweb	Waiakea	goldendome	web	juvenile	female	0.597	0.777	9.53	57	-2.65	45.42	0.27	-26.61			yes	0.112627
160207CG35	2016	bweb	Waiakea	goldendome	web	adult	female	0.645	0.969	11.31	73	-0.04	46.27	0.3	-26.81			yes	0.145412
160206SK34	2016	bweb	Waiakea	goldendome	web	juvenile	female	0.435	0.708	10.09	44	-1.75	45.24	0.2	-26.5			yes	0.202768
160208SK029	2016	bweb	Waiakea	goldendome	web	juvenile	female	0.601	0.851	10.08	61	-2.22	44.98	0.27	-25.52			yes	0.20773
160206SK02	2016	bweb	Waiakea	goldendome	web	juvenile	female	0.365	0.735	10.21	37	-0.47	45.89	0.17	-26.21			yes	0.223191
160206SK41	2016	bweb	Waiakea	perkinsi	web	juvenile	unknown	0.798		8.81	70	-1.83	47.45	0.38	-26.28			yes
160208SK049	2016	bweb	Waiakea	perkinsi	web	juvenile	unknown	1.183		10.32	122	-1.83	43.06	0.51	-25.71			yes
160208CG100	2016	bweb	Waiakea	perkinsi	web	juvenile	unknown	2.819		9.99	175	-1.45	46.45	0.81	-25.16			yes
160208SK036	2016	bweb	Waiakea	perkinsi	web	juvenile	unknown	1.105		11.69	129	-4.43	42.6	0.47	-25.04			yes
160207CG34	2016	bweb	Waiakea	perkinsi	web	juvenile	unknown	2.086		10.45	218	-1.2	44.61	0.93	-27.88			yes
160213SK24	2016	bweb	Waiakea	perkinsi	web	juvenile	unknown	1.088		10.19	111	-0.01	42.63	0.46	-27.2			yes
160213SK18	2016	bweb	Waiakea	perkinsi	web	juvenile	unknown	3.784		11.09	182	-4.5	46.86	0.77	-25.73			yes
160207SK27	2016	bweb	Waiakea	perkinsi	web	juvenile	unknown	0.707		10.38	73	-3.47	46.33	0.33	-26.87			yes
160208SK054	2016	bweb	Waiakea	perkinsi	web	juvenile	unknown	0.959		7.7	74	-3.78	43.98	0.42	-27.29			yes
160209SK027	2016	bweb	Waiakea	perkinsi	web	juvenile	unknown	2.609		10.76	281	-0.12	44.1	1.15	-25.69			yes
0413OL11	2015	cweb	Olaa	perkinsi	web	adult	female	14.582	2.155	11.83	186	2.65	50	0.79	-25.08	4.23	9.923	yes
0414OL01	2015	cweb	Olaa	perkinsi	web	juvenile	unknown	2.99	1.306	11.23	172	0.38	48.58	0.74	-25.63	4.33	5.332	yes
0414OL07	2015	cweb	Olaa	perkinsi	web	adult	female	12.845	2.093	11.89	215	4.33	46.6	0.84	-24.63	3.92	9.079	yes
0418OL12	2015	cweb	Olaa	perkinsi	web	adult	male	6.706	1.814	10.3	168	1.64	50.27	0.82	-25.85	4.88	7.097	yes
0418OL14	2015	cweb	Olaa	perkinsi	web	juvenile	male	7.575	1.616	10.63	201	1.87	53.32	1.01	-23.67	5.02	7.91	yes
160206SK04	2016	bweb	Waiakea	hawaiensis	web	juvenile	unknown	1.181	0.932	10.86	128	-1.4	42.86	0.51	-26.57			yes
160207SK19	2016	bweb	Waiakea	hawaiensis	web	juvenile	unknown	2.346	1.112	10.34	243	0.31	43.24	1.01	-26.74			yes
160206ARE141B	2016	bweb	Waiakea	hawaiensis	web	juvenile	unknown	1.183	0.95	10	118	-3.09	43.46	0.51	-25.07			yes
160206SK22	2016	bweb	Waiakea	hawaiensis	web	juvenile	unknown	1.275	0.955	9.55	122	-0.05	42.76	0.55	-26.7			yes
160206SK64	2016	bweb	Waiakea	hawaiensis	web	juvenile	unknown	0.863	0.865	10.09	87	-3.33	44.19	0.38	-25.08			yes
160206SK43	2016	bweb	Waiakea	hawaiensis	web	juvenile	unknown	0.693	0.788	8.86	61	-3.27	42.86	0.3	-26.46			yes
160208SK041	2016	bweb	Waiakea	hawaiensis	web	juvenile	unknown	0.571	0.869	11.6	66	-2.22	43.76	0.25	-25.28			yes
160206SK66	2016	bweb	Waiakea	hawaiensis	web	juvenile	unknown	0.911	0.969	10.92	100	-1.47	43.01	0.39	-25.5			yes
160213SK23	2016	bweb	Waiakea	hawaiensis	web	juvenile	unknown	0.843	0.898	10.22	86	-1.1	41.86	0.35	-25.79			yes
160213ARE86	2016	bweb	Waiakea	hawaiensis	web	juvenile	unknown	1.453	0.859	8.22	119	-1.4	41.99	0.61	-25.36			yes
0311LA01	2015	dweb	Laupahoehoe	hawaiensis	web	juvenile	male	1.993	1.294	11.53	216	3.68	48.13	0.9	-26.16	4.17	5.241	yes
0311LA05	2015	dweb	Laupahoehoe	hawaiensis	web	adult	female	3.251	1.453	11.6	177	3.5	45.68	0.7	-26.68	3.94	5.839	yes
0311LA06	2015	dweb	Laupahoehoe	hawaiensis	web	juvenile	unknown	1.705	1.088	10.84	164	3.84	48.16	0.73	-26.84	4.44	4.334	yes
0313LA07	2015	dweb	Laupahoehoe	hawaiensis	web	juvenile	unknown	0.826	0.883	8.98	74	3.25	49.57	0.41	-27.57	5.52	2.969	yes
0313LA11	2015	dweb	Laupahoehoe	hawaiensis	web	juvenile	unknown	0.511	0.721	9.63	49	2.91	52.17	0.27	-27.59	5.42	2.316	yes
0413OL04	2015	cweb	Olaa	hawaiensis	web	adult	female	10.178	1.501	11.33	168	4.08	50.73	0.75	-24.53	4.48	7.805	yes
0413OL07	2015	cweb	Olaa	hawaiensis	web	adult	female	3.581	1.403	11.37	190	1.85	51.46	0.86	-24.69	4.52	5.985	yes
0414OL05	2015	cweb	Olaa	hawaiensis	web	juvenile	unknown	0.676	0.902	12.06	82	2	43.9	0.3	-23.75	3.64	3.241	yes
0414OL06	2015	cweb	Olaa	hawaiensis	web	juvenile	unknown	0.438	0.721	10.07	44	1.28	48.6	0.21	-25.87	4.82	2.084	yes
0414OL09	2015	cweb	Olaa	hawaiensis	web	juvenile	unknown	0.853	0.887	11.87	101	2.13	43.17	0.37	-23.05	3.64	3.549	yes
0417OL26	2015	cweb	Olaa	hawaiensis	web	juvenile	unknown	2.921	1.195	11.07	219	3.56	45.92	0.91	-23.85	4.15	5.338	yes
0418OL13	2015	cweb	Olaa	hawaiensis	web	adult	male	4.014	1.411	9.1	134	2.97	43.27	0.64	-24.31	4.75	6.491	yes
160206SK67	2016	bspin	Waiakea	anuenue	spiny	juvenile	unknown	0.525	0.783	8.99	47	-5.14	47.39	0.25	-27			yes
160207CG36	2016	bspin	Waiakea	anuenue	spiny	juvenile	female	1.722	1.068	9.65	166	-3.59	50.53	0.87	-27.51			yes
160209ARE106E	2016	bspin	Waiakea	anuenue	spiny	juvenile	female	2.704	1.11	10.25	156	-4.16	52.26	0.79	-28.56			yes
160209CG046	2016	bspin	Waiakea	anuenue	spiny	juvenile	unknown	0.691	0.868	11.01	76	-4.63	47.75	0.33	-27.02			yes
160213ARE06	2016	bspin	Waiakea	anuenue	spiny	juvenile	unknown	0.612	0.882	10.73	66	-6.71	44.92	0.27	-27.62			yes
160213SK17	2016	bspin	Waiakea	anuenue	spiny	juvenile	unknown	0.673	0.966	11.67	79	-6.22	44.83	0.3	-26.69			yes
160213SK30	2016	bspin	Waiakea	anuenue	spiny	juvenile	unknown	0.614	0.78	9.47	58	-5.92	47.07	0.29	-28.54			yes
160213SK34	2016	bspin	Waiakea	anuenue	spiny	juvenile	unknown	0.626	0.985	10.71	67	-5.19	47.33	0.3	-26.99			yes
160215SK06	2016	bspin	Waiakea	anuenue	spiny	juvenile	male	1.122	0.894	8.98	101	-4.23	48	0.54	-27.31			yes
0413OL14	2015	cspin	Olaa	anuenue	spiny	adult	male	1.525	1.067	11.29	172	4.09	48.48	0.74	-23.78	4.29	3.618	yes	0.0325931
0414OL.ANU01	2015	cspin	Olaa	anuenue	spiny	juvenile	unknown	1.224		10.7	131	-1.49	44.34	0.54	-26.57	4.15		yes	0.123918
0415OL.ANU01	2015	cspin	Olaa	anuenue	spiny	adult	male	1.099	1.024	11.83	130	0.2	45.17	0.5	-26.37	3.82	3.751	yes	0.171422
0414OL.ANU08	2015	cspin	Olaa	anuenue	spiny	adult	male	1.07	1.101	10.05	107	-0.45	46.02	0.49	-27.04	4.58	3.463	yes	0.229888
0414OL.ANU03	2015	cspin	Olaa	anuenue	spiny	adult	male	1.04	1.012	11.46	119	0.35	44.77	0.47	-25.8	3.91	3.418	yes	0.235592
0415OL.UNK02	2015	cspin	Olaa	anuenue	spiny	adult	male	1.107	0.985	11.28	125	0	45.86	0.51	-26.77	4.06	3.605	yes	0.239849
0413OL12	2015	cspin	Olaa	anuenue	spiny	adult	male	1.107	1.075	11.2	124	-0.13	45.74	0.51	-25.73	4.09	3.477	yes	0.337726
0413OL05	2015	cspin	Olaa	anuenue	spiny	adult	male	1.047	1.02	11.61	122	0.75	44.75	0.47	-26.13	3.85	3.744	yes	0.344031
0414OL.ANU07	2015	cspin	Olaa	anuenue	spiny	juvenile	male	1.139	0.932	10.49	119	0.02	45.52	0.52	-26.24	4.34	3.386	yes	0.447454
0413OL09	2015	cspin	Olaa	anuenue	spiny	adult	male	1.257	1.063	10.79	136	0.78	46.96	0.59	-27.75	4.35	3.851	yes	0.555635
0402LA.ANU02	2015	dspin	Laupahoehoe	anuenue	spiny	juvenile	male	1.572	0.98	10.07	158	2.12	50.11	0.79	-28.38	4.98	3.822	yes	0.173279
0402LA.ANU01	2015	dspin	Laupahoehoe	anuenue	spiny	adult	female	2.533	1.123	10.59	176	3.77	51.9	0.86	-28.99	4.9	4.305	yes	0.238895
0312LA17	2015	dspin	Laupahoehoe	anuenue	spiny	adult	female	1.937	1.199	11.06	214	3.05	46.49	0.9	-27.85	4.2	4.201	yes	0.293265
0406LA.ANU02	2015	dspin	Laupahoehoe	anuenue	spiny	adult	female	2.407	1.176	10.33	233	2.19	46.35	1.04	-28.09	4.49	4.278	yes	0.315948
0312LA14	2015	dspin	Laupahoehoe	anuenue	spiny	juvenile	unknown	1.545	0.985	10.24	158	2.94	49.02	0.76	-27.97	4.79	3.419	yes	0.37576
0323LA.ANU01	2015	dspin	Laupahoehoe	anuenue	spiny	adult	female	2.799	1.043	10.06	154	2.44	48.31	0.74	-27.65	4.8	4.182	yes	0.420921
0324LA.ANU01	2015	dspin	Laupahoehoe	anuenue	spiny	juvenile	unknown	0.734	0.888	10.43	77	2.78	45.53	0.33	-27.23	4.37	2.866	yes	0.515698
0314LA09	2015	dspin	Laupahoehoe	anuenue	spiny	adult	male	1.394	1.056	11.16	156	2.15	46.28	0.65	-27.42	4.15	3.881	yes	0.60911
0406LA.ANU01	2015	dspin	Laupahoehoe	anuenue	spiny	juvenile	unknown	1.891	1.07	10.16	192	3.06	46.12	0.87	-28.39	4.54	3.857	yes	0.646236
0315LA15	2015	dspin	Laupahoehoe	anuenue	spiny	adult	male	1.745	1.108	11.03	192	2.68	50.34	0.88	-27.84	4.57	4.034	yes	0.682663
160206SK35	2016	bspin	Waiakea	brevignatha	spiny	adult	male	2.605		11.47	299	-3.48	45.37	1.18	-26.08			yes
160206SK83	2016	bspin	Waiakea	brevignatha	spiny	juvenile	unknown	0.241		9.76	24	-3.54	44.63	0.11	-26.73			yes
160207CG32	2016	bspin	Waiakea	brevignatha	spiny	juvenile	unknown	0.319		10.53	34	-3.87	49.61	0.16	-27.28			yes
160208SK037	2016	bspin	Waiakea	brevignatha	spiny	adult	female	2.575		11.05	284	-3.69	45.92	1.18	-26.8			yes
160208SK084	2016	bspin	Waiakea	brevignatha	spiny	juvenile	unknown	0.824		10.57	87	-3.77	45.66	0.38	-27.99			yes
160213SK01	2016	bspin	Waiakea	brevignatha	spiny	adult	female	3.433		9.63	188	-4.25	47.68	0.93	-26.89			yes
160213SK14	2016	bspin	Waiakea	brevignatha	spiny	adult	female	4.602		10.96	173	-3.54	50.41	0.8	-26.9			yes
160213SK28	2016	bspin	Waiakea	brevignatha	spiny	adult	male	3.307		11.81	182	-2.23	48.58	0.75	-25.67			yes
160213SK29	2016	bspin	Waiakea	brevignatha	spiny	adult	female	6.273		11.03	170	-2.5	50.29	0.78	-27.19			yes
160213SK32	2016	bspin	Waiakea	brevignatha	spiny	adult	male	2.777		10.96	184	-3.41	50.92	0.85	-26.74			yes
0324LA.BRE01	2015	dspin	Laupahoehoe	brevignatha	spiny	juvenile	unknown	1.652	1.35	9.88	163	2.03	52.86	0.87	-28.01	5.35	6.241	yes	0.0288625
0323LA.BRE02	2015	dspin	Laupahoehoe	brevignatha	spiny	adult	male	2.929	1.423	12.23	175	2.98	46.9	0.67	-26.32	3.83	5.689	yes	0.250833
0324LA.BRE05	2015	dspin	Laupahoehoe	brevignatha	spiny	juvenile	unknown	1.183	1.012	10.59	125	2.79	45.56	0.54	-28.47	4.3	3.868	yes	0.290006
0323LA.BRE03	2015	dspin	Laupahoehoe	brevignatha	spiny	adult	male	3.098	1.398	11.76	150	2.09	45.25	0.58	-26.67	3.85	5.681	yes	0.342738
0323LA.BRE05	2015	dspin	Laupahoehoe	brevignatha	spiny	adult	male	2.415	1.392	12.01	286	2.08	45.96	1.09	-27.08	3.83	5.817	yes	0.343694
0314LA06	2015	dspin	Laupahoehoe	brevignatha	spiny	juvenile	unknown	1.536	1.075	10.98	169	0.62	45.84	0.7	-27.06	4.17	4.53	yes	0.454165
0314LA07	2015	dspin	Laupahoehoe	brevignatha	spiny	juvenile	unknown	1.791	1.22	10.97	196	1.21	50.92	0.91	-27.14	4.64	4.626	yes	0.457672
0324LA.BRE04	2015	dspin	Laupahoehoe	brevignatha	spiny	juvenile	unknown	1.588	1.141	11	175	2.2	47.37	0.75	-27.43	4.31	4.199	yes	0.460269
0323LA.BRE04	2015	dspin	Laupahoehoe	brevignatha	spiny	juvenile	unknown	0.801	0.874	9.97	80	1.05	48.36	0.39	-27.76	4.85	3.285	yes	0.481881
0324LA.BRE03	2015	dspin	Laupahoehoe	brevignatha	spiny	adult	male	3.465	1.234	12.32	185	1.85	47.59	0.71	-26.43	3.86	5.874	yes	0.575186
0314LA08	2015	dspin	Laupahoehoe	quasimodo	spiny	juvenile	unknown	2.741	1.207	11	150	2.81	48.17	0.66	-26.63	4.38	4.634	yes	0.0230183
0323LA.QUA03	2015	dspin	Laupahoehoe	quasimodo	spiny	juvenile	unknown	1.678	1.258	9.35	157	2.93	47.4	0.8	-26.52	5.07	4.833	yes	0.100967
0315LA10	2015	dspin	Laupahoehoe	quasimodo	spiny	juvenile	male	1.166	1.132	11.36	132	2.97	45.03	0.53	-26.32	3.96	3.575	yes	0.23859
0312LA07	2015	dspin	Laupahoehoe	quasimodo	spiny	juvenile	male	2.147	1.402	10.95	235	2.68	44.98	0.97	-25.9	4.11	4.69	yes	0.26182
0314LA20	2015	dspin	Laupahoehoe	quasimodo	spiny	juvenile	unknown	4.788	1.399	10.93	159	3.57	47.23	0.69	-26.41	4.32	5.759	yes	0.289449
0314LA01	2015	dspin	Laupahoehoe	quasimodo	spiny	juvenile	unknown	2.41	1.432	9.66	233	1.85	48.09	1.16	-26.63	4.98	4.907	yes	0.324481
0311LA.BROWN1	2015	dspin	Laupahoehoe	quasimodo	spiny	juvenile	female	6.392		9.96	165	4.01	48.69	0.81	-26.83	4.89		yes	0.439402
0314LA02	2015	dspin	Laupahoehoe	quasimodo	spiny	juvenile	unknown	2.104	1.959	9.23	194	2.76	48.71	1.02	-26.48	5.28	7.624	yes	0.442992
0312LA03	2015	dspin	Laupahoehoe	quasimodo	spiny	juvenile	unknown	0.551	0.935	11.23	62	2.1	47.92	0.26	-25.46	4.27	2.457	yes	0.459636
0314LA03	2015	dspin	Laupahoehoe	quasimodo	spiny	juvenile	unknown	1.682		10.04	169	2.64	50.45	0.85	-26.92	5.03		yes	0.681533
160208SK085	2016	bspin	Waiakea	quasimodo	spiny	juvenile	unknown	0.819	1.027	10.06	82	-5.84	46.43	0.38	-26.26			yes	0.115257
160208SK079	2016	bspin	Waiakea	quasimodo	spiny	juvenile	unknown	3.578	1.404	10.24	155	-5.35	50.56	0.77	-26.81			yes	0.169923
160206SK81	2016	bspin	Waiakea	quasimodo	spiny	juvenile	female	0.852	1.045	10.31	88	-3.8	50.43	0.43	-26.58			yes	0.327089
160209SK016	2016	bspin	Waiakea	quasimodo	spiny	adult	female	0.774	1.076	10.66	83	-3.63	46.03	0.36	-26.02			yes	0.377292
160208SK087	2016	bspin	Waiakea	quasimodo	spiny	juvenile	unknown	1.164	1.239	10.45	122	-5.25	45.81	0.53	-27.4			yes	0.441947
160208SK080	2016	bspin	Waiakea	quasimodo	spiny	juvenile	unknown	0.807	0.866	8.77	71	-5.1	48.25	0.39	-26.14			yes	0.475266
160208CG096	2016	bspin	Waiakea	quasimodo	spiny	juvenile	unknown	4.074	1.446	9.64	168	-4.74	49.58	0.86	-25.83			yes	0.501396
160209SK010	2016	bspin	Waiakea	quasimodo	spiny	juvenile	unknown	0.967	0.984	10.4	101	-3.11	47.83	0.46	-26.09			yes	0.599495
160209SK011	2016	bspin	Waiakea	quasimodo	spiny	juvenile	unknown	0.819	0.989	9.49	78	-5.25	47.24	0.39	-25.87			yes	0.72955
160208SK066	2016	bspin	Waiakea	quasimodo	spiny	juvenile	unknown	3.925	1.439	9.91	141	-5.47	48.57	0.69	-26.96			yes	0.855566
160209ARE079E	2016	bzAri	Waiakea	Ariamnes	zAri	juvenile	male	0.732	0.762	10	73	-0.68	49.58	0.36	-26.52			yes	0.0380903	waikula
160209SK026	2016	bzAri	Waiakea	Ariamnes	zAri	juvenile	unknown	0.796	0.647	10.99	87	0.06	48.76	0.39	-26.24			yes	0.0980321	waikula
160206SK25	2016	bzAri	Waiakea	Ariamnes	zAri	juvenile	unknown	0.516	0.628	9.8	51	-0.84	50.33	0.26	-27			yes	0.122848	waikula
160213SK27	2016	bzAri	Waiakea	Ariamnes	zAri	juvenile	male	0.713	0.72	9.44	67	-1.37	48.28	0.34	-26.28			yes	0.157757	waikula
160213SK05	2016	bzAri	Waiakea	Ariamnes	zAri	juvenile	unknown	0.684	0.663	9.78	67	-2.1	43.59	0.3	-25.72			yes	0.190497	waikula
160209ARE070E	2016	bzAri	Waiakea	Ariamnes	zAri	adult	female	3.502	1.055	10.64	184	0.85	53.99	0.93	-25.9			yes	0.223201	hiwa
160213ARE83	2016	bzAri	Waiakea	Ariamnes	zAri	adult	female	2.839	1.004	11.33	175	-1.35	51.79	0.8	-25.76			yes	0.322853	waikula
160206SK54	2016	bzAri	Waiakea	Ariamnes	zAri	juvenile	unknown	1.205	0.844	10.93	132	-0.29	45.1	0.54	-25.3			yes	0.333531	waikula
160208SK040	2016	bzAri	Waiakea	Ariamnes	zAri	juvenile	unknown	0.459	0.668	10.45	48	-1.17	46.89	0.22	-26.18			yes	0.587611	waikula
0323LA.ARI01	2015	dzAr	Laupahoehoe	Ariamnes	zAri	adult	male	1.061	0.87	10.04	106	5.93	47.91	0.51	-26.67	4.77	6.8	yes		waikula
0323LA.ARI02	2015	dzAr	Laupahoehoe	Ariamnes	zAri	juvenile	unknown	0.416	0.585	10.22	43	3.58	46.44	0.19	-26.72	4.54	2.987	yes		hiwa
0323LA.ARI03	2015	dzAr	Laupahoehoe	Ariamnes	zAri	adult	female	3.633	0.997	10.99	162	4.6	49.96	0.74	-26.24	4.55	7.168	yes		waikula
0323LA.ARI06	2015	dzAr	Laupahoehoe	Ariamnes	zAri	juvenile	unknown	0.527	0.646	9.46	50	5.44	47.35	0.25	-26.92	5.01	3.764	yes		hiwa
0323LA.ARI07	2015	dzAr	Laupahoehoe	Ariamnes	zAri	adult	female	2.651	1.04	10.38	159	3.85	52.72	0.81	-26.77	5.08	6.979	yes		waikula
0324LA.ARI01	2015	dzAr	Laupahoehoe	Ariamnes	zAri	juvenile	unknown	0.837	0.63	10.06	84	4.53	49.9	0.42	-27.39	4.96	3.165	yes		hiwa
0324LA.ARI03	2015	dzAr	Laupahoehoe	Ariamnes	zAri	adult	female	1.069	0.963	12.02	128	4.68	44.51	0.48	-26.93	3.7	5.256	yes		waikula
0324LA.ARI04	2015	dzAr	Laupahoehoe	Ariamnes	zAri	adult	female	2.831	1.069	11.47	171	5.14	48.49	0.72	-26.42	4.23	7.645	yes		waikula
0324LA.ARI05	2015	dzAr	Laupahoehoe	Ariamnes	zAri	adult	female	2.372	0.969	10.57	249	4.93	46.86	1.1	-26.59	4.43	5.754	yes		waikula
0413OL.ARI02	2015	czAr	Olaa	Ariamnes	zAri	adult	female	3.786	1.002	11.48	185	3.5	52.97	0.86	-24.81	4.61	8.616	yes		waikula
0414OL.ARI02	2015	czAr	Olaa	Ariamnes	zAri	adult	female	3.625	1.138	12.01	95	4.15	46.95	0.37	-24.41	3.91		yes		hiwa
0415OL.ARI01	2015	czAr	Olaa	Ariamnes	zAri	adult	female	2.778	0.995	11.56	112	4.39	46.73	0.45	-24.06	4.04	8.151	yes		waikula
0415OL.ARI03	2015	czAr	Olaa	Ariamnes	zAri	adult	female	2.622	0.986	10.77	152	4.76	48.79	0.69	-25.23	4.53	7.098	yes		hiwa
0415OL.ARI04	2015	czAr	Olaa	Ariamnes	zAri	adult	female	2.887	1.038	12.26	139	3.62	49.8	0.57	-25.56	4.06		yes		waikula
0415OL.ARI05	2015	czAr	Olaa	Ariamnes	zAri	adult	female	2.576	1.013	12.02	304	3.49	45.99	1.16	-25.09	3.83	7.477	yes		waikula
0415OL.ARI06	2015	czAr	Olaa	Ariamnes	zAri	adult	female	2.976	1.005	11.85	178	4.97	48.46	0.73	-24.77	4.09	6.844	yes		hiwa
0416OL.ARI01	2015	czAr	Olaa	Ariamnes	zAri	unknown	unknown	1.195	1.024	12.06	144	0.73	46.46	0.56	-25.26	3.85	5.266	yes		waikula
0416OL.ARI02	2015	czAr	Olaa	Ariamnes	zAri	adult	female	2.489	1.109	11.42	160	5.22	45.17	0.63	-24.1	3.95	8.135	yes		hiwa
SK05	2015	cpla	Olaa	Cibotium	plant			5.958		1.09	65	-3.96	43.32	2.58	-28.04	39.65		yes
SK06	2015	cpla	Olaa	Metrosideros	plant			6.018		1.23	74	-1.17	46.39	2.79	-30.49	37.81		yes
SK07	2015	cpla	Olaa	Cheirodendron	plant			5.972		1.68	100	-3.86	42.04	2.51	-32.13	25.08		yes
SK19	2015	dpla	Laupahoehoe	Cheirodendron	plant			5.972		2.06	123	0.88	44.09	2.63	-32.31	21.41		yes
SK21	2015	dpla	Laupahoehoe	Metrosideros	plant			6.081		1.03	63	0.49	44.96	2.73	-32.33	43.71		yes
SK28	2015	dpla	Laupahoehoe	Cibotium	plant			5.974		2.02	120	-0.26	47.07	2.81	-30.33	23.35		yes
160206CIB1	2016	bpla	Waiakea	Cibotium	plant					1.61	100	-8.31	45.59	2.84	-29.57			yes
160206MET1	2016	bpla	Waiakea	Metrosideros	plant					0.71	43	-9.65	45.31	2.75	-31.58			yes
160206CHEI	2016	bpla	Waiakea	Cheirodendron	plant					1.61	96	-8.1	41.94	2.5	-31.45			yes
160206CIB2	2016	bpla	Waiakea	Cibotium	plant					2.14	135	-8.73	46.94	2.95	-28.41			yes
160206MET2	2016	bpla	Waiakea	Metrosideros	plant	sapling				0.8	47	-10.27	46.36	2.76	-31.19			yes
NS161015.01	2016	bplit	Waiakea	mixed.Metrosideros.and.Cibotium	litter					0.82	48	-1.91	51.04	3.01	-28.84			yes
NS161015.02	2016	bplit	Waiakea	Metrosideros	litter					0.64	40	-1.41	52.73	3.27	-29.93			yes
NS161015.03	2016	bplit	Waiakea	mixed.Metrosideros.Cibotium.and.others	litter					0.81	51	-2.34	49.27	3.06	-27.92			yes
